# Supplementary material
Source: Elsevier journal article supplement (https://www.sciencedirect.com/science/article/pii/S2529993X18302727)

## DOCUMENTO DE CONSENSO

# Documento de consenso sobre alteraciones metabólicas y riesgo cardiovascular en pacientes con infección por el VIH

**Grupo de expertos del Grupo de Estudio sobre Alteraciones Metabólicas (GEAM), de la Secretaría del Plan Nacional sobre el Sida (SPNS) y del Grupo de Estudio de Sida (GeSIDA)**

---

**Objetivo:** Actualizar las recomendaciones sobre alteraciones metabólicas y riesgo cardiovascular en pacientes con infección por el VIH.

**Métodos:** Este documento ha sido consensuado por un panel de expertos de GEAM, de la SPNS y de GESIDA tras revisar los resultados de eficacia y seguridad de ensayos clínicos, estudios de cohortes y de farmacocinética publicados en revistas biomédicas (PubMed y Embase) o presentados a congresos. La fuerza de la recomendación y la gradación de su evidencia se basan en los criterios del sistema GRADE.

**Resultados:** Se recomienda un estilo de vida saludable, no fumar y realizar al menos 30 minutos de ejercicio aeróbico al día. En los pacientes diabéticos, se recomienda utilizar el mismo algoritmo terapéutico que en la población no VIH. Los pacientes VIH con dislipemia deben ser considerados como mínimo de alto RCV por lo que su objetivo terapéutico será LDLc menor de 100 mg/dL. Los antihipertensivos de las familias IECA y ARA II son los mejor tolerados y con menor riesgo de interacciones. Se recomienda descartar esteatosis hepática en pacientes diabéticos o con síndrome metabólico y con elevación de transaminasas sin etiología definida. Se actualizan así mismo las recomendaciones de actuación en alteraciones hormonales.

**Conclusiones:** En este nuevo documento se actualizan las recomendaciones previas respecto a todas aquellas alteraciones metabólicas que intervienen en el riesgo cardiovascular. Así mismo se incluyen las alteraciones hormonales y su manejo y la repercusión hepática de las alteraciones metabólicas.

Palabras clave: Infección VIH, Alteraciones metabólicas, Riesgo cardiovascular

**Abstract**

**Objective:** This consensus document is an update of metabolic disorders and cardiovascular risk guidelines for HIV-infected patients.

**Methods :** This document has been approved by an expert panel of GEAM , the SPNS GESIDA and after reviewing the results of efficacy and safety of clinical trials, cohort and pharmacokinetic studies published in biomedical journals (PubMed and Embase ) or presented in medical scientific meetings. Recommendation strength and the evidence in which they are supported are based on the GRADE system.

**Results:** A healthy lifestyle is recommended, no smoking and at least 30 minutes of aerobic exercise daily. In diabetic patients the same treatment than HIV-uninfected patients is recommended. HIV patients with dyslipidemia should be considered as with high CVR so its therapeutic objective is LDL less than 100 mg/dL. The antihypertensive of IECA inhibitors and ARA II families are better tolerated and less risk of interactions. In HIV-patients with diabetes or metabolic syndrome and elevated transaminases without defined etiology, it's recommended to rule out a hepatic steatosis Recommendations for action in hormonal alterations are updated.

**Conclusions:** These new guidelines updated previous recommendations regarding all those metabolic disorders involved in cardiovascular risk. Also hormonal changes and their management and the impact of metabolic disorders on the liver are included.

Key words: HIV infection, Metabolic disorders, cardiovascular risk

## INTRODUCCIÓN

### 1.1. Objetivos y alcance del documento

La importancia de las alteraciones en el metabolismo hidrocarbonado, lipídico, y su repercusión en aparatos y sistemas en los pacientes con infección por el VIH requiere de un estudio particularizado y una actualización continua.

El objetivo del presente documento es aportar información práctica desde el punto de vista asistencial, relativo a las principales alteraciones metabólicas que se producen en la infección por el VIH con el fin de proporcionar estrategias de tratamiento adecuadas a cada paciente y servir de herramienta de consulta para todos los profesionales que atienden a pacientes con infección por el VIH y que pueden presentar o presentan alguna de las alteraciones metabólicas recogidas en este documento.

### 1.2. Metodología

Para la elaboración de este documento se constituyó un grupo de expertos compuesto por especialistas en medicina interna, endocrinología y nutrición con experiencia en el ámbito del VIH, actuando tres miembros del panel como coordinadores. Cada miembro del panel ha aceptado participar de forma voluntaria y altruista.

Cada redactor realiza una revisión de la evidencia científica (última revisión noviembre de 2016) disponible de cada uno de los aspectos que se incluyen en el documento y, con ella, escribe su capítulo que es discutido y revisado por el revisor asignado, remarcándose en amarillo los cambios realizados en el mismo. Una vez compilado el documento se remite a todos los miembros del panel para su discusión. Posteriormente, se realiza una reunión de consenso de todo el panel y se somete a la revisión externa exponiéndose durante un periodo de tiempo en la Web de las entidades promotoras para que los profesionales a los que va dirigido y cualquier persona interesada pueda sugerir matices o cambios decidiendo el panel *a posteriori* su inclusión o no.

Para la valoración de la calidad de la evidencia y la graduación de las recomendaciones se ha utilizado el sistema GRADE (*Grading of Recommendations of Assessment Development and Evaluations*)<sup>1-5</sup> (Tabla 1). Para la elaboración de los capítulos se ha realizado una búsqueda bibliográfica en las siguientes bases de datos: *Medline, Pubmed, UpToDate, Web of Science, Registro Cochrane y MD Consult* incluyendo artículos desde el año 2000 a 2016.

## **2. EVALUACIÓN CLÍNICA.**

En la tabla 2 se recogen las recomendaciones para la evaluación clínica de las alteraciones metabólicas en pacientes con infección por el VIH<sup>6-9</sup>:

### **3. REPERCUSIÓN CARDIOVASCULAR**

Los pacientes con infección por el VIH tienen mayor riesgo de enfermedad cardio-vascular (ECV) que la población general. Aunque el mecanismo por el que se produce la lesión vascular no se conoce con certeza, intervienen diversos factores, que incluyen factores genéticos, los factores de riesgo cardiovascular (FRCV) tradicionales (Tabla 3), el TAR y parámetros relacionados con el propio VIH, como son los cambios inflamatorios e inmunológicos, incluso en pacientes con buen control inmunoviroológico<sup>10-13</sup>.

Los fármacos antirretrovirales (FARV) actualmente recomendados para pautas de primera línea tienen escaso impacto desde el punto de vista metabólico y cardiovascular<sup>10,11,14,15</sup>.

#### **3.1. Evaluación del riesgo cardiovascular y estrategias de prevención**

La identificación de los pacientes con elevado riesgo de sufrir ECV es esencial para la adopción de medidas preventivas y debería formar parte de la evaluación clínica ordinaria de todos los pacientes con infección por el VIH. La estimación del riesgo individual de sufrir un ECV se puede realizar con ecuaciones convencionales aunque carecen de precisión en población VIH; la de Framingham en concreto sobreestima el RCV (riesgo cardiovascular) en estos pacientes respecto a otras como SCORE<sup>16</sup>.

Se han desarrollado modelos que incluyen parámetros relacionados con el VIH y con el TAR como el del grupo de estudio DAD<sup>17</sup> y la adaptación del Framingham a la población VIH española<sup>18</sup>. El RCV también puede estimarse según el número de factores de riesgo

mayores o independientes distintos del colesterol LDL (historia familiar de cardiopatía isquémica precoz, edad  $\geq 45$  años en varones y  $\geq 55$  años en mujeres, tabaquismo, HTA y colesterol HDL bajo). Un HDLc  $\geq 60$  mg/dL es protector y resta un factor. Cuando están presentes  $>3$  factores se considera que el RCV es elevado ( $>20\%$ ) o intermedio ( $10-20\%$ ), cuando están presentes 2 ó más, el RCV es intermedio ( $10-20\%$ ) o bajo ( $<10\%$ ) y cuando existe uno o ningún factor, se considera bajo ( $<10\%$ ).

Las estrategias para disminuir el RCV incluyen el control de la replicación del VIH mediante el TAR y la identificación y control de los FRCV tradicionales (Tabla 3). Otras estrategias como el uso de estatinas (acción antiinflamatoria o inmunomoduladora<sup>19</sup>) o la antiagregación con aspirina<sup>20</sup> como prevención primaria están por dilucidar.

### **Recomendaciones**

1. *Se debe estimar el riesgo individual de sufrir una ECV con la mayor exactitud posible. (Recomendación fuerte, baja calidad de la evidencia)*
2. *Se debe modificar la dieta y estilo de vida e intervenir sobre todos los factores modificables, muy especialmente el tabaquismo, con mayor o menor intensidad en función del riesgo estimado. (Recomendación fuerte, moderada calidad de la evidencia).*
3. *Se deben remitir al cardiólogo los pacientes con antecedentes de ECV y debe considerarse enviar a aquellos con RCV elevado. (Recomendación fuerte, baja calidad de la evidencia)*

#### **4. ESTILO DE VIDA SALUDABLE**

El estilo de vida es el determinante de salud que más influye en la misma y el más modificable mediante actividades de promoción de la salud o prevención primaria.

Se debe basar en tres aspectos fundamentales: una alimentación saludable, erradicar el hábito del tabaco y realizar ejercicio de forma regular.

La práctica de un estilo de vida saludable en la población que incluya ejercicio físico regular adaptado a sus condiciones de salud, el abandono de consumo de sustancias tóxicas y unos hábitos de alimentación saludable, pueden conseguir mejorar la calidad de vida del paciente y reducir el RCV.

Existe evidencia científica sobre la importancia de la modificación de los hábitos de vida en la prevención de las ECV y en la promoción de la salud en pacientes con el VIH. La modificación de los hábitos alimentarios, el sedentarismo y la exposición al tabaco son algunos estilos de vida que influyen sobre los factores de riesgo<sup>21-24</sup> No obstante, en casos con riesgo alto, las intervenciones pueden ser complejas y los beneficios sutiles y difíciles de demostrar a corto plazo.

Los objetivos dependerán del RCV de cada individuo tomados a partir de una valoración completa del paciente con VIH (Tabla 4).

#### **4.1. Alimentación Saludable**

La modificación en la dieta es recomendada para hacer frente a un perfil lipídico alterado que predisponga a la ECV en pacientes con VIH. Las pautas de alimentación saludable deben tener como objetivo suministrar los nutrientes para mantener los procesos metabólicos, mantener un peso adecuado y favorecer el buen estado de salud del paciente.

La alimentación del paciente con VIH debe tener las siguientes características básicas de toda alimentación saludable:

- **Variada:** Incluir la mayor diversidad de alimentos posible a fin de mejorar la calidad nutricional de la dieta y alcanzar los requerimientos nutricionales.
- **Equilibrada:** Proporciones adecuadas y adaptada a las necesidades nutricionales de cada paciente. Debe mantener el equilibrio entre las cantidades de cada uno de los nutrientes con respecto a la ingesta energética total (hidratos de carbono del 55-60%, lípidos del 25-30% y 12-15% de proteínas de alto valor biológico). La cantidad de fibra

debe oscilar entre 25-30 g/día.

La dieta mediterránea aporta vitaminas y minerales con gran capacidad antioxidante, ácidos grasos omega-3, fitoquímicos y fitosteroles. Sus componentes modulan los niveles de lipoproteínas lo que mejora la función endotelial y la vasodilatación<sup>25</sup>. Recientemente se ha publicado el efecto beneficioso que la dieta mediterránea ejerce sobre la incidencia de ECV en pacientes que presentan un elevado riesgo cuando ésta es suplementada con aceite de oliva extra virgen y frutos secos<sup>26</sup>, debido a su capacidad antioxidante. El paciente con infección por el VIH precisa de apoyo nutricional, bien en situaciones de pérdida de peso secundarias a desnutrición, o bien para modificar a través de la dieta las alteraciones metabólicas y de composición corporal<sup>27</sup>.

#### **4.2. Tabaquismo**

El consumo de tabaco y la exposición al humo ambiental de tabaco es un importante factor de RCV y de mortalidad asociada a ECV, respiratoria y neoplásica. Este riesgo se asocia a factores como el tiempo que se lleva fumando, a la cantidad de cigarrillos que se fuman a diario, a la profundidad de la inhalación, y al contenido en nicotina y alquitrán. La nicotina posee una enorme capacidad adictiva, genera síntomas cognitivos, exacerba la actividad adrenérgica, con elevación de la tasa metabólica basal, estimula la secreción de sustancias como la dopamina y la serotonina que actúan en el centro regulador del apetito disminuyendo la ingesta y, favorece la peroxidación lipídica en el tejido adiposo<sup>28</sup>. Todos estos mecanismos se asocian a la pérdida de peso. La ganancia de peso media al dejar de fumar es de 5-6 Kg atribuible a la falta de nicotina.

De acuerdo con la American Heart Association, el tabaquismo es por sí mismo el mayor factor de RCV modificable que contribuye a la morbilidad prematura<sup>29</sup>. No debemos olvidar que alrededor del 60-80% de los pacientes VIH+ fuman<sup>30</sup>. Estudios de cohortes como el de la ART-CC demuestran que los pacientes VIH bien controlados pueden perder más años de vida a consecuencia del tabaco que por la propia infección VIH. La tasa de mortalidad de los fumadores comparados con los no fumadores fue de 1,94 veces más. Estos datos enfatizan la necesidad de priorizar intervenciones para el abandono del hábito tabáquico<sup>31</sup>.

### Riesgos adicionales en las mujeres:

- La probabilidad de padecer un infarto se multiplica por 10 en mujeres que fuman y utilizan anticonceptivos orales.
- Entre las fumadoras, la menopausia se adelanta una media de entre 2 y 3 años con respecto a las mujeres que nunca han fumado.
- Aumenta el riesgo de sufrir osteoporosis.

Una adecuada intervención terapéutica, conductual y/o farmacológica, implica diagnosticar de forma individual y conocer las circunstancias de la conducta adictiva, los estímulos a los que se asocia, los beneficios, a corto y a largo plazo, que aporta o los déficits que cubre, los obstáculos que se oponen al cambio y los recursos disponibles, para que los pacientes sean capaces de afrontar con un mínimo de garantía de éxito el tratamiento<sup>29,31</sup>.

Existen diversos métodos con evidencia científica contrastada, empleados para la deshabituación tabáquica. El consejo médico en el contexto de la atención sanitaria rutinaria, es una de las intervenciones clínicas más coste-efectivas para promover el abandono del tabaquismo<sup>32</sup>. El consumo de tabaco se debe recoger en la historia clínica. Si el paciente quiere dejar de fumar, se realizaría una intervención de educación individual o grupal para la deshabituación y ésta puede ir acompañada de tratamiento farmacológico, según las características del paciente. Existen tres tipos de medicamentos principales para la deshabituación: la terapia sustitutiva con nicotina (TSN), como los parches de nicotina, y otros fármacos como el bupropión y la vareniclina. Con estos dos últimos, se han descrito hasta un 38%-44% de ceses tabáquicos al año en los pacientes con el VIH, cifras similares a las obtenidas en la población general<sup>29</sup>. Los efectos secundarios, especialmente de la vareniclina<sup>33</sup>, se dirigen hacia la esfera psiquiátrica, aunque los últimos meta-análisis y estudios realizados muestran que estos medicamentos son eficaces y seguros para ayudar a dejar de fumar a fumadores sin patología neuro-psiquiátrica<sup>34</sup>.

El consejo en tabaquismo se enmarcaría en Atención Primaria<sup>35</sup>, así mismo existen unidades



de deshabituación en atención especializada para abordar los casos más complejos o con comorbilidades.

En relación con los cigarrillos electrónicos, su seguridad y eficacia como ayuda para dejar de fumar no han sido demostradas<sup>36</sup>. La Organización Mundial de la Salud (OMS) advierte que no existe suficiente evidencia científica que permita excluir los riesgos para la salud asociados al uso o exposición al vapor de los cigarrillos electrónicos y menos aún que constituyan una terapia efectiva de reemplazo<sup>37</sup>. Se han descrito intoxicaciones y efectos adversos relacionados con estos productos, así mismo su utilización genera emisión de propilenglicol, partículas PM2.5, nicotina y sustancias cancerígenas.

Por el momento en España se encuentran regulados por la Ley 28/2005, de 26 de diciembre, de medidas sanitarias frente al tabaquismo, a través de la modificación introducida el 14 de septiembre de 2014, que establece la prohibición de su consumo en centros educativos, sanitarios, transporte público y administraciones públicas<sup>38</sup>. En la Directiva 2014/40/UE, los cigarrillos electrónicos se encuentran regulados como productos relacionados con el tabaco, por lo que tendrán que cumplir nuevos requerimientos específicos, así mismo la normativa nacional será adaptada convenientemente.

#### **4.3. Actividad Física**

Existe múltiples evidencias científicas que avalan los efectos negativos inducidos por la ausencia o escasez de ejercicio físico, un inadecuado perfil lipídico o un mal control metabólico o de la presión arterial, relacionados con un estilo de vida sedentario<sup>31</sup>

Existe una relación evidente entre la actividad física y la mejora de la salud psicológica relacionada con un mayor nivel de autoestima y reducción de la ansiedad (Tabla 5). Así mismo, las intervenciones dirigidas a lograr la práctica progresiva del ejercicio han demostrado en los pacientes con VIH, mejoras en la función y fuerza muscular, en la redistribución de la grasa y en la función cardiovascular (especialmente con el ejercicio aeróbico) así como en el perfil lipídico y la sensibilidad a la insulina, lo que

redunda en una mejora del RCV<sup>39</sup>. Observaciones transversales sugieren además que la actividad física moderada se asocia con un menor deterioro neurocognitivo y un mejor desempeño instrumental en las actividades de la vida diaria en los pacientes con VIH más mayores<sup>40</sup>.

El Comité Español Interdisciplinario para la Prevención Cardiovascular recomienda aumentar la actividad física<sup>41</sup> y su promoción en todos los grupos de edad e incluso los pacientes de alto riesgo deben recibir consejo profesional para realizar actividad física de forma segura y controlada. La prescripción de actividad física es el proceso por el que un programa de ejercicio es aplicado de forma sistemática e individualizada.

Como pauta general aceptada por Guía Europea de Prevención Cardiovascular en la Práctica Clínica debe realizarse al menos 30 minutos de ejercicio aeróbico al día<sup>41</sup>. Andar ligero, correr, nadar o montar en bicicleta son ejemplos de ejercicio aeróbico.

### **Recomendaciones**

- 1. Se recomienda modificar los hábitos de conducta para obtener un estilo de vida saludable. (Recomendación fuerte, moderada calidad de la evidencia)*
- 2. Se recomienda no fumar o abandonar el hábito tabáquico con el objeto de disminuir los efectos sobre la salud. (Recomendación fuerte, alta calidad de la evidencia)*
- 3. Se recomienda, como pauta general, realizar al menos 30 minutos de ejercicio aeróbico al día. (Recomendación fuerte, moderada calidad de la evidencia)*

## **5. ALTERACIONES DE LA DISTRIBUCIÓN DE GRASA CORPORAL**

Tras la llegada del TAR, pronto se puso de manifiesto la aparición de alteraciones en la distribución de la grasa corporal como el acúmulo de grasa central (“lipoacúmulo”) y la pérdida de grasa en cara y extremidades (“lipoatrofia”) tras el inicio del mismo, acuñándose el término de “lipodistrofia”. Esta lipodistrofia se asocia, además, con

alteraciones metabólicas como dislipemia, hipertensión, resistencia insulínica y diabetes. La incidencia de la lipodistrofia ha disminuido con la llegada de los nuevos antirretrovirales. Su prevalencia se estima entre el 10 y el 80%, explicándose esta variabilidad por la metodología empleada para su diagnóstico y por la frecuencia de uso de los antirretrovirales asociados a lipodistrofia en las distintas cohortes según el año del estudio. Aunque existen cuadros puros de lipoatrofia o de lipoacúmulo, en algunos pacientes coexiste la lipoatrofia y el lipoacúmulo<sup>42,43</sup>.

### 5.1. Lipoatrofia

- **Factores de riesgo:** El principal factor de riesgo para el desarrollo de lipoatrofia es el uso de inhibidores de la transcriptasa inversa análogos de nucleósidos (ITIAN), en particular el AZT, DDI y D4T. Con estos fármacos, la lipoatrofia puede manifestarse antes de los dos años de tratamiento. La capacidad de los análogos timidínicos para favorecer el desarrollo de lipoatrofia se ha atribuido a su capacidad de inhibir la ADN polimerasa mitocondrial con la consiguiente toxicidad mitocondrial. Si bien otros antirretrovirales en la clase de los inhibidores de la transcriptasa inversa no análogos de nucleósidos (ITINAN) y los inhibidores de la proteasa (IP) se han asociado también con la lipoatrofia, el riesgo, en ausencia de AZT o D4T, es menos evidente<sup>42</sup>. Algunos estudios han sugerido que los IP potenciarían la capacidad de los análogos timidínicos para producir lipoatrofia, si bien los IP, por sí solos, no parecen condicionar el desarrollo de lipoatrofia<sup>43-47</sup>. Entre los factores no farmacológicos asociados con la lipoatrofia se encuentran una edad más elevada, una menor cantidad de grasa corporal antes del inicio del TAR, y un nadir de CD4 más bajo<sup>42,43</sup>.

- **Cuadro clínico:** La lipoatrofia se caracteriza por una pérdida de grasa

subcutánea en cara, brazos, piernas, abdomen y nalgas, no así de masa muscular. Debido al aspecto característico que produce, la lipoatrofia es uno de los principales factores que contribuye al estigma de las personas con VIH.

- **Diagnóstico:** Es recomendable evaluar sistemáticamente la presencia de lipoatrofia en los pacientes con VIH. El diagnóstico puede establecerse por los hallazgos en el examen físico. La auto-percepción del paciente puede ser el indicador más precoz de cambios en la grasa corporal. La Absorciometría Radiológica Dual (DEXA) es la mejor técnica para cuantificar objetivamente la distribución de la grasa corporal, aunque su uso con este objetivo no está estandarizado. La grasa corporal puede cuantificarse también por tomografía

computerizada, resonancia magnética, y medidas antropométricas<sup>42,43</sup>.

- **Tratamiento:** En la tabla 6 se recoge en manejo de la lipodistrofia.

a) Dieta saludable y ejercicio: debido a que se asocia con dislipemia, resistencia insulínica y diabetes, se debe poner especial énfasis en la importancia de mantener una dieta saludable y un buen nivel de ejercicio aeróbico<sup>43,48</sup>.

b) Cambio de TAR: debido a su mayor toxicidad, los análogos timidínicos no forman parte en la actualidad de los esquemas de TAR contemplados en las guías de tratamiento. Por tanto, debe realizarse un esfuerzo proactivo para sustituir estos fármacos por otros menos tóxicos en aquellos pacientes que los sigan recibiendo. Esta estrategia, que ha demostrado su eficacia en ensayos clínicos, implicaría cambiar los ITIAN de estos pacientes por otras pautas basadas en la combinación fija de ABC/3TC o TDF/FTC o diseñar pautas libres de ITIAN. Debido a que los IP parecen aumentar el riesgo de lipodistrofia, como estrategia adicional se ha estudiado el cambio del tercer fármaco. Sin embargo, el impacto de esta intervención no ha demostrado un impacto significativo en los ensayos clínicos<sup>45,46</sup>.

c) Cirugía plástica: La infiltración de sustancias sintéticas o de grasa autóloga se utiliza para corregir la lipoatrofia facial (LAF). El efecto es beneficioso para los pacientes en los que la lipoatrofia es evidente y comporta una negativa carga psicológica y social que disminuye su calidad de vida. Son procedimientos técnicamente sencillos y con pocos efectos adversos, a excepción de la posibilidad de granulomas, hematomas en la zona de inyección, discreto dolor pasajero, y cierto riesgo de infección. Hay diferencias entre la infiltración de grasa o de sustancias sintéticas y, a su vez, entre las distintas sustancias con respecto a la duración de la reparación y de repetición de la técnica, así como de su coste. Sin embargo, y aunque efectivas, se trata sólo de una solución estética que no corrige los cambios metabólicos que han llevado a la alteración del reparto de la grasa. En la actualidad, la cirugía reparadora de la LAF con grasa autóloga está incluida dentro de la Cartera del Sistema Nacional de Salud.

d) Tiazolidinedionas: se ha atribuido a esta familia de antidiabéticos orales efectos beneficiosos sobre la lipoatrofia<sup>49</sup>. Sin embargo, debido a problemas relacionados con su seguridad (aumento del riesgo de hepatitis, insuficiencia cardíaca y osteoporosis), su uso no está indicado en la práctica clínica en la actualidad para esta indicación.

## 5.2. Lipoacúmulo

- **Factores de riesgo:** Si bien el acúmulo de grasa está ampliamente descrito con el TAR, a diferencia de lo observado en la lipoatrofia ningún antirretroviral en particular está claramente implicado, por lo que puede desarrollarse con cualquier régimen<sup>43</sup>. Aunque los IP se han asociado en mayor medida, los estudios de secuenciación del TAR desde un IP a un tercer fármaco alternativo no han observado diferencias en la ganancia de grasa abdominal<sup>45-46</sup>. Las mujeres, los pacientes de mayor edad, con hipertrigliceridemia, y con un mayor porcentaje de grasa parecen presentar un mayor riesgo de lipoacúmulo durante el TAR.

- **Cuadro clínico:** El acúmulo de grasa abdominal se produce fundamentalmente a expensas de la grasa visceral, lo que produce un aumento del perímetro abdominal. La "giba de búfalo" se produce por un exceso de grasa dorsocervical. En ocasiones, el lipoacúmulo se produce en el tronco, el tórax, a nivel retromamario, o en forma de lipomas. A diferencia de la obesidad de la población general, en donde el mayor acúmulo de grasa abdominal ocurre a nivel subcutáneo, el lipoacúmulo asociado a VIH se produce fundamentalmente en la grasa visceral. Un paciente VIH con lipoatrofia y lipoacúmulo podría presentar un panículo adiposo abdominal mínimo con aumento del perímetro abdominal a expensas de un aumento de la grasa visceral (Figura 1). Además, en la obesidad asociada a VIH la grasa se acumula en ocasiones en el hígado y los músculos.

- **Diagnóstico:** Se basa en la observación de los signos característicos en el examen físico. La obesidad abdominal puede detectarse con medidas antropométricas, considerándose anormal un perímetro abdominal superior a 102 cm en varones y 88 cm en mujeres. Al igual que para la lipoatrofia, el DEXA proporciona información precisa sobre la distribución de la grasa corporal, siendo alternativas la tomografía computerizada y la resonancia magnética.

- **Tratamiento:**

a) Dieta saludable y ejercicio: Debido a que se asocia con dislipemia, resistencia insulínica y diabetes, se debe poner especial énfasis en la importancia de la dieta saludable y el ejercicio. Sin embargo, los datos sobre eficacia son muy escasos<sup>48</sup>.

b) Metformina: En los pacientes con VIH con diabetes mellitus, la metformina tiene un beneficio adicional ya que favorece la disminución de la grasa visceral. Sin embargo, debe evitarse en los pacientes con lipoatrofia moderada/grave ya que puede contribuir a

disminuir más la grasa subcutánea. Su efecto es superior cuando se combina con ejercicio aeróbico<sup>48</sup>.

c) Tesamorelina: El uso de este análogo de la hormona del crecimiento está aprobado

en Estados Unidos. Desde 2010 este fármaco no está disponible en Europa para este fin ya que podría empeorar la resistencia insulínica y carece de datos sobre su seguridad a largo plazo. Por tanto, no es posible utilizarlo en España<sup>50</sup>

d) Cirugía: La liposucción es eficaz, en ocasiones, para la reducción del lipoacúmulo dorsocervical. En el caso de lipoacúmulo en la región mamaria, la mamoplastia reductora es de utilidad. Sin embargo, el hecho de que el acúmulo en abdomen sea a expensas de la grasa visceral impide el abordaje quirúrgico en esta localización<sup>51</sup>.

## **Recomendaciones**

### **Diagnóstico**

1. *Se recomienda el uso de la DEXA como método diagnóstico de la distribución de la grasa corporal. (Recomendación fuerte, baja calidad de la evidencia)* En caso de no disponer de DEXA se podrá utilizar en su lugar medidas antropométricas, y otras pruebas de imagen como la tomografía computerizada y resonancia magnética. *(Recomendación débil, alta calidad de la evidencia)*

### **Prevención**

2. *Se recomienda llevar un estilo de vida saludable. (Recomendación fuerte, baja calidad de la evidencia)*

3. *Se recomienda evitar los análogos timidínicos en cualquier pauta de TAR.*

*(Recomendación fuerte, alta calidad de la evidencia)*

### **Tratamiento**

4. *En los pacientes con lipoatrofia, se recomienda la cirugía facial reparadora con grasa*

*autóloga o sustancias sintéticas. (Recomendación fuerte, moderada calidad de la evidencia)*

5. *Sólo se recomienda la liposucción ultrasónica (UAL) para corregir el acumulo de grasa dorso-cervical en los casos en los que se traduzca en una disminución de la calidad de vida de los pacientes. (Recomendación fuerte, muy baja calidad de la evidencia)*

6. *Se recomienda la resección quirúrgica en los casos de depósitos de grasa localizada. (Recomendación fuerte, muy baja calidad de la evidencia).*

## 6. ALTERACIONES DEL METABOLISMO HIDROCARBONADO

La prevalencia de alteraciones en el metabolismo hidrocarbonado es mayor en los pacientes con infección por VIH (5-25%), con una incidencia de 5-10% de nuevos diagnósticos de diabetes mellitus (DM)<sup>52</sup>. Sin embargo, algunos autores relacionan ese aumento sólo en caso de antecedentes de tratamiento con inhibidores de la proteasa de primera generación<sup>53</sup>. La etiopatogenia de la DM suma los factores clásicos de la población no VIH a los propios de la enfermedad, su tratamiento o comorbilidades (Tabla 7)<sup>54</sup>. Recientemente se ha descrito una relación entre ganancia de peso en el primer año de TAR y mayor incidencia de DM<sup>55</sup>.

### 6.1. Implicaciones clínicas

Las alteraciones del metabolismo de la glucosa constituyen un factor de riesgo determinante para el desarrollo de ECV, mayor cuanto más tiempo es la duración de la hiperglucemia. Si en la población general, la DM es un equivalente coronario, esta asociación no es tan clara en el VIH. En los pacientes de la cohorte DAD tener DM suponía menor riesgo que un evento coronario (aunque eran pacientes jóvenes, de 30-40 años, con sólo 5 años de evolución de la DM y por lo tanto, poco riesgo de daño vascular)<sup>56</sup>. Sin embargo, en la cohorte francesa del *HIV-HEART* encontraron 4 veces más riesgo de disfunción diastólica (marcador precoz de enfermedad coronaria) que en población no infectada<sup>57</sup>.

La asociación de DM y VIH también incrementa el riesgo de enfermedad renal crónica<sup>58</sup>. También se ha descrito una mayor incidencia de neuropatía y de daño neurológico en seropositivos con DM<sup>52</sup>.

La coinfección por VHC tiene una relación bidireccional con la DM. La DM favorece la fibrosis hepática y la infección por virus de la hepatitis C (VHC) produce insulinoresistencia, progresión a DM y peor control metabólico, además de condicionar el uso de fármacos potencialmente hepatotóxicos<sup>52</sup>.

## 6.2. Diagnóstico

Los criterios diagnósticos de DM son similares a los de la población general<sup>59</sup>, siguiendo las recomendaciones de la European AIDS Clinical Society (EACS)<sup>60</sup>. Una glucemia en ayunas repetida  $\geq 126$  mg/dl es diagnóstico de DM. También una hemoglobina glicada (A1c)  $\geq 6,5\%$ . Sin embargo, la medición aislada de A1c puede infraestimar los valores de glucemia plasmática debido a mayor volumen corpuscular medio (VCM) de los hematíes o al uso de abacavir, por lo que los valores de glucemia basal y postprandial (tras una sobrecarga oral de 75 g de glucosa) alcanzan una mayor significación. Las guías de la Asociación de Atención Primaria Americana de Enfermedades Infecciosas (IDSA) plantean utilizar un punto de corte de A1c de 5,8% por su mayor sensibilidad y especificidad<sup>61</sup>. (Tabla 8)

Según la EACS, y a diferencia de población seronegativa, se recomienda determinar cifras de glucemia en ayunas en el momento del diagnóstico de la infección por VIH, previo al inicio del tratamiento, a los 3-6 meses de un cambio, y cada 6-12 meses, una vez estabilizado el tratamiento<sup>61</sup>. Es cuestionable en menores de 45 años sin FRCV la posibilidad de realizar el cribado cada 3 años. Hasta la fecha no hay evidencia para determinar un intervalo de cribado u otro.

La detección de las complicaciones se hace con el seguimiento de albuminuria y fondo de ojo anualmente. Si apareciesen síntomas de polineuropatía en paciente con diabetes de corta evolución, habría que descartar toxicidad por TAR o causas infecciosas como causa más posible.



### 6.3. Tratamiento

El objetivo de control metabólico es una A1c  $\leq 7\%$ , similar a población no infectada, individualizando según edad, expectativa de vida, comorbilidades, riesgo de hipoglucemias y costes<sup>62</sup>. Así, en jóvenes con diabetes de corta duración se consideraría una A1c de 6,5-7%, mientras que en ancianos o pacientes con mucha comorbilidad, el objetivo de 8-8,5% podría ser más adecuado.

El manejo de la DM tipo 2 se esquematiza en la tabla 9. En grandes rasgos, es igual que para población no VIH con algunas consideraciones.

Inicialmente se recomiendan cambios en el estilo de vida junto a tratamiento con metformina. Tras la metformina, asociada a ésta o en sustitución, en caso de lipoatrofia marcada o riesgo de lactacidosis, se plantea la utilización de pioglitazona, aunque el mayor riesgo de fractura en menopáusicas, el cáncer de vejiga y la insuficiencia cardíaca son factores limitantes. Las sulfonilureas están más indicadas en pacientes no obesos con hiperglucemia severa, dadas las consideraciones sobre seguridad cardiovascular de algunas de ellas.

A pesar de que no existen ensayos clínicos en pacientes VIH que lo avalen, el grupo de las incretinas (inhibidores de DPP4 y análogos de receptor de péptido similar al glucagón tipo 1 (GLP1)) supone una buena opción frente a las sulfonilureas, por su seguridad hasta la fecha (reducción de mortalidad cardiovascular con liraglutide) y escasas interacciones con los fármacos antirretrovirales. Los resultados positivos de mortalidad cardiovascular con empagliflozina en pacientes no VIH<sup>63</sup>, el efecto beneficioso sobre el peso, la posibilidad de asociación con cualquier fármaco para la DM y la escasa interacción con TAR de los inhibidores de cotransportador de sodio- glucosa tipo 2 renal (iSGLT2) pueden plantear una opción interesante en pacientes VIH aunque sin evidencia aún en la literatura. No debe olvidarse el riesgo de 5-10% de infecciones genitourinarias que éstos producen. Finalmente, si no es posible el control con combinaciones de hipoglucemiantes no insulínicos, la hiperglucemia es severa o bien se trata de una DM tipo 1, se recomienda la insulinoterapia con las mismas pautas que en la población no VIH. No hay evidencia de una menor eficacia de los fármacos para la DM en pacientes con VIH respecto a los no

VIH pareados, aunque se han descrito peores respuestas en afroamericanos e hispanos<sup>64</sup>. En la tabla 10 se resumen las principales características de los fármacos para la diabetes y sus interacciones con el TAR<sup>65</sup>. Dada la amplia selección de fármacos antirretrovirales en la actualidad, se recomiendan aquellos que puedan tener un perfil glucémico más beneficioso en pacientes de riesgo. Como con el resto de los fármacos, es importante recordar las posibles interacciones farmacológicas (a través citocromo p450 o los transportadores renales).

### **Recomendaciones**

1. *La hiperglucemia es un factor de riesgo cardiovascular que debe tratarse.*

**(Recomendación fuerte, alta calidad de la evidencia)**

2. *Se recomienda el cribado periódico, al inicio del TAR, a los 3 meses del TAR y cada 6-12 meses una vez estabilizado el tratamiento. (Recomendación fuerte, baja calidad de la evidencia)*

3. *La glucemia basal y la hemoglobina glicosilada (A1c) sirven para el diagnóstico y seguimiento (Recomendación fuerte, alta calidad de la evidencia). El objetivo*

*de A1c es el mismo que para la población general (HbA1c < 7%).*

**(Recomendación fuerte, moderada calidad de la evidencia)**

4. *El cribado de complicaciones asociadas a la diabetes en los pacientes con infección por VIH es similar a la población no VIH. (Recomendación fuerte, moderada calidad de la evidencia)*

5. *Se recomienda utilizar el mismo algoritmo terapéutico que en la población no VIH teniendo en cuenta las interacciones con el TAR. La metformina es la primera opción farmacológica excepto en pacientes con lipoatrofia marcada, riesgo de lactacidosis o enfermedad renal avanzada. (Recomendación fuerte, moderada*

**calidad de la evidencia)**

6. Tras la metformina o si contraindicada, pueden utilizarse sulfonilureas (en pacientes no obesos) o pioglitazona (si lipoatrofia marcada). Con el resto de los fármacos (incretinas e inhibidores de SGLT2) no hay suficiente experiencia. **(Recomendación débil, baja calidad de la evidencia)**

7. Cuando los antidiabéticos fracasan, hay clínica franca de hiperglucemia, o cuando se trata de una diabetes tipo 1, la insulina sigue siendo el fármaco de elección, con un manejo y ajuste similar al de la población general. **(Recomendación fuerte, alta calidad de la evidencia)**

8. El tratamiento del resto de los factores de riesgo cardiovascular asociados (dislipemia, hipertensión arterial) son claves para la prevención de eventos cardiovasculares y deben tenerse en cuenta. **(Recomendación fuerte, alta calidad de la evidencia)**

## 7. ALTERACIONES DEL METABOLISMO LIPÍDICO

La dislipemia en pacientes con infección por el VIH es muy frecuente y se asocia con un aumento del RCV. Esto es debido, en parte, al TAR y a un aumento de la inflamación y de la activación inmune debida a la infección crónica por el VIH<sup>66</sup>.

Las alteraciones del metabolismo lipídico en pacientes con infección por el VIH presentan unas características diferentes a las de la población general. Por un lado, el VIH aumenta la resistencia a la insulina. Por otro lado, el propio tratamiento con ARV puede inducir la aparición de dislipidemia, pero además puede provocar interacciones con los fármacos hipolipemiantes. El patrón observado con más frecuencia en pacientes en TAR suele ser el de la dislipemia aterogénica, caracterizada por HDLc bajo y triglicéridos (TG) elevados, acompañado de elevaciones variables de colesterol total (CT) y LDLc. Habitualmente este patrón se asocia a partículas de LDLc aterogénicas, densas y pequeñas<sup>67,68</sup>.

### 7.1. Valoración de los pacientes candidatos a tratamiento

Son numerosos los datos que sugieren que la infección por el VIH se asocia a un aumento de la ECV. Por este motivo se deben evaluar los distintos FRCV como parte de la visita médica, y de manera muy especial, en pacientes con tratamiento antirretroviral. La evaluación de estos FRCV será utilizada para predecir el riesgo individual para el desarrollo de ECV<sup>67,69</sup>. Actualmente disponemos de varios métodos para el cálculo del riesgo, como la ecuación de Framingham, REGICOR (calibración de las Tablas de Framingham aplicadas a España) el SCORE (*Systematic Coronary Risk Evaluation*) o el modelo de RCV DAD. En [www.hivpv.org](http://www.hivpv.org)<sup>70</sup> se puede acceder a alguna de estas calculadoras de riesgo y en [www.imim.cat/ofertadeserveis/software-public/regicor/?](http://www.imim.cat/ofertadeserveis/software-public/regicor/?)<sup>66</sup> al REGICOR<sup>71</sup>. La recomendación es utilizar uno de estos métodos para la evaluación inicial, y repetirse anualmente en todas las personas en tratamiento, para asegurar que las diferentes intervenciones se realicen en el momento adecuado.

En los últimos años se ha producido una profunda revisión de las Guías para el tratamiento de las dislipemias. Las clásicas Guías de la NCEP/ATP III vigentes durante más de una década han dado paso a las actuales, destacando por repercusión y cambio conceptual las Joint ESC Guidelines de 2016<sup>72</sup>, las de la European AIDS Clinical Society de 2015<sup>73</sup> y sobretodo, las de la AHA/ACC de 2014<sup>74</sup>.

El planteamiento actual es decidir quién debe llevar tratamiento con estatinas, de alta e moderada intensidad (Tabla 11), en función de su RCV, independiente de las cifras de lípidos basales, y con el objetivo de reducir los niveles de LDLc basales más de un 50%, o entre un 30 o un 50%. En estas recomendaciones se aconseja iniciar tratamiento con estatinas si el RCV estimado es superior al 7,5% a los 10 años, aunque no existe una evidencia sólida que sustente estas recomendaciones en los pacientes con infección VIH. En general, se recomienda individualizar el manejo del RCV en pacientes VIH, partiendo de la base de que es una población con mayor riesgo que la población general. Tampoco existe suficiente evidencia para considerar cuál es el mejor método de análisis del riesgo en nuestra población entre las diferentes tablas disponibles (Regicor, Framingham, ASCVD o DAD). Por su facilidad de uso creemos que la escala Regicor podría ser una buena herramienta de estimación del riesgo en pacientes con infección

VIH, aun reconociendo que en esta población en general infraestima el RCV.

Las Guías de la ACC/AHA recomiendan estatinas de alta intensidad en sujetos con ECV, LDLc >190, DM tipo 1 o tipo 2 con RCV a 10 años  $\geq 7,5\%$ . El objetivo es alcanzar una reducción del LDLc >50% sobre los valores anteriores al inicio del tratamiento. Se recomiendan estatinas de moderada intensidad en diabéticos con RCV <7,5% y en prevención primaria en sujetos entre 40 y 75 años con RCV  $\geq 7,5\%$ . El objetivo en este caso es alcanzar una reducción de LDLc entre 30 y 50% (Tabla 12). En el caso de llevar tratamiento que puedan generar interacciones con las estatinas, como es el caso del TAR, la recomendación es iniciar con estatinas de moderada Intensidad<sup>74</sup>

Las Guías de la European AIDS Clinical Society también recomiendan iniciar tratamiento con estatinas si existe ECV o DM tipo 2 o RCV a 10 años  $\geq 10\%$ , pero sí marcan un objetivo óptimo (CT  $\leq 155$ , LDLc  $\leq 80$ ) o estándar (CT  $\leq 190$ , LDLc  $\leq 115$ )<sup>73</sup>.

Las Guías de la ESC/EAS recientemente publicadas, consideran al paciente con infección VIH de alto RCV, por lo que recomiendan considerar el tratamiento con estatinas para alcanzar el objetivo de LDLc  $\leq 100$  mg/dl o una reducción superior al 50% si el LDLc basal se situaba entre 100 y 200 mg/dl (Tabla 13)<sup>72</sup>. El riesgo de los

pacientes VIH podría ser el mismo que el de los sujetos con factores de riesgo únicos muy elevados (colesterol total >310 mg/dL), hipertensión arterial con cifras de presión >180/110 mmHg, la mayoría de los pacientes con diabetes, con insuficiencia renal moderada (eFG 30–59 mL/min), o con un cálculo del riesgo según las tablas de Score entre 5-10%.

En caso de que los niveles de LDLc no se puedan calcular por el elevado nivel de triglicéridos (>400 mg/dl), se deberá utilizar el colesterol no c-HDL (= CT - c-HDL), cuyo objetivo es 30 mg/dL más elevado que el objetivo correspondiente de LDLc<sup>68,69</sup>.

## 7.2. Abordaje terapéutico

Las medidas terapéuticas eficaces en prevención primaria incluyen el mantenimiento de un estilo de vida saludable (dieta y ejercicio físico) comentados en capítulos previos y en casos necesarios el tratamiento farmacológico específico para el tipo de dislipemia. El algoritmo de manejo de la dislipemia en pacientes con VIH se resume en la figura 2.

### 7.2.1. Estatinas

Son los fármacos hipolipemiantes de elección por su seguridad, eficacia clínica, capacidad para reducir los niveles de LDLc y coste<sup>67,69,73</sup>. En pacientes con infección por el VIH la selección de la estatina debe hacerse en base tanto a su eficacia como a sus interacciones con otros antirretrovirales. Además, como en el resto de la población hay que vigilar la posible toxicidad hepática y muscular.

En la mayoría de pacientes la estatina de elección es la Atorvastatina, por su amplia experiencia clínica y su eficacia. Se metaboliza parcialmente por el sistema CYP3A4, y en general presenta pocas interacciones (Tabla 14). Se recomienda iniciar con dosis de 10 mg.

En pacientes que reciben IP o ITIAN potenciados con ritonavir o cobicistat, la estatina que podría ser de elección por su perfil de interacciones sería la Pitavastatina<sup>75</sup>, ya que es la estatina con menos capacidad de provocarlas. No se metaboliza por el CYP3A4, tiene un perfil de efectos adversos favorable, sin alterar el metabolismo de la glucosa. Iniciar con dosis diaria de 4 mg.

La Rosuvastatina es una estatina potente, que no presenta interacciones relevantes ya que no se metaboliza por el CYP3A4, sin embargo puede empeorar la resistencia a la insulina. Se recomienda iniciar por 10 mg.

Finalmente, Pravastatina tampoco se metaboliza por el CYP3A4, podría ser una alternativa aceptable al resto de estatinas, pero al ser menos eficaz, no se plantea como primera opción.

Simvastatina está contraindicada con los IP potenciados con ritonavir y los inhibidores de la integrasa potenciados con cobicistat, dada su alta metabolización por CYP3A4. También

presenta una potencial interacción con la mayoría de los inhibidores de la transcriptasa inversa no análogos de nucleósido (ITINN), por lo que su uso puede estar limitado a casos individuales.

Tras el inicio del tratamiento con estatinas se recomienda realizar un perfil lipídico en ayunas a los 3-4 meses, y después cada 6-12 meses.

### **7.2.2. Fibratos**

Si tras medidas higiénico-dietéticas los niveles de TG son >500 mg/dl estaría indicado iniciar el tratamiento con fibratos. Su acción hipolipemiente fundamental es reducir las cifras de TG facilitando un mayor catabolismo de las VLDL<sup>67,69</sup>. Su metabolización es por la vía del CYP4a, por lo que no existen interacciones destacables con los ARV. Entre ellos, el fenofibrato revela un claro perfil antiaterogénico en pacientes con infección VIH, además es el fibrato de elección para combinarlo con estatinas por presentar menor riesgo de miopatías. La dosis más adecuada es la de 145 mg en comprimidos recubiertos con película una vez al día. En caso de enfermedad renal crónica, se recomienda gemfibrozilo 600 mg/12 h o 900 mg/24 h

### **7.2.3. Otros fármacos**

- Ezetimibe: Reduce la absorción intestinal del colesterol de la dieta. Estaría indicado para el control lipídico en pacientes con infección por VIH siempre asociado a estatinas en aquellos casos en los que la respuesta a la estatina sola sea escasa<sup>73</sup>.

- Omega 3: Indicados en el tratamiento de la hipertrigliceridemia grave, con riesgo de pancreatitis aguda (TG >900 mg/dl) en los que los fibratos no permitan alcanzar los objetivos o no sean tolerados. Los fibratos son más baratos y más eficaces. Las dosis recomendadas de omega tres son 2 g cada 12 h.

- iPCSK9: Alirocumab y Evolocumab son anticuerpos monoclonales IgG1 completamente humanos que se unen con alta afinidad y especificidad a la proproteína convertasa subtilisina/kexina tipo 9 (PCSK9). La PCSK9 se une al receptor de LDLc del hepatocito estimulando su degradación. La inhibición de la PCSK9 aumenta el número de receptores de LDLc disponibles, permitiendo reducciones marcadas del LDLc. Como tratamiento biológico

no se metaboliza por el CYP3A4, por lo que no son previsibles las interacciones con los ARV. Actualmente están financiados solo en pacientes con Hipercolesterolemia Familiar y en pacientes con ECV establecida que no alcanzan un LDLc <100 a pesar de llevar altas dosis de estatinas, o cuando estas no sean toleradas o estén contraindicadas<sup>72</sup>.

### **7.3. Cambio del TAR para mejorar el perfil metabólico**

Los fármacos actuales en general presentan un perfil lipídico favorable; sólo en algunas ocasiones se puede plantear el modificar el tratamiento antirretroviral con la única finalidad de provocar con un cambio favorable en los lípidos plasmáticos. Siempre debe tenerse en cuenta el riesgo de fracaso del tratamiento si el cambio no contempla el historial farmacológico del paciente o la presencia de mutaciones de resistencia. Los fármacos que se asocian a un mejor perfil lipídico son la nevirapina, que incrementa los niveles de HDLc a través de su capacidad de incrementar la producción de apoA1, y tenofovir difumarato (TDF), que posee un efecto hipolipemiente *per se*.

### **7.4. Cuándo derivar al paciente VIH al especialista en lípidos o cuándo solicitar un estudio genético para el despistaje de hiperlipemia familiar**

En general, resulta razonable derivar al paciente VIH al especialista en lípidos cuando no se alcanzan los objetivos de LDLc con el uso de los fármacos hipolipemiantes indicados anteriormente a las dosis máximas, especialmente cuando el RCV del paciente sea elevado.

El despistaje de hiperlipemia familiar podría estar indicado según recomienda la OMS en presencia de los siguiente datos: familiar de primer grado con enfermedad cardiovascular prematura y/o con LDLc > percentil 95 (>200-400 mg/dL); Familiar de primer grado con xantomas tendinosos y/o niños menores de 18 años con LDLc > percentil 95. O bien en pacientes que presenten xantomas tendinosos o arco corneal antes de los 45 años, o en presencia de niveles muy elevados de LDL<sup>72</sup>.

## **Recomendaciones**

### **1. Valorar siempre la presencia de dislipemia en pacientes con infección por el VIH por**



*ser ésta una complicación frecuente en pacientes en TAR. (Recomendación fuerte, alta calidad de la evidencia)*

2. *Iniciar siempre tratamiento de la dislipemia con recomendaciones alimentarias y de estilo de vida específicas según la alteración lipídica presente. (Recomendación fuerte, moderada calidad de la evidencia)*

3. *En todos los pacientes VIH debe calcularse el RCV con alguna calculadora de riesgo disponible para uso clínico, si bien recomendamos el uso de las tablas de Regicor, al tratarse de población española. En pacientes con ECV establecida, DM tipo 2 o RCV > 5% a 10 años, se debe iniciar tratamiento con estatinas. (Recomendación fuerte, moderada calidad de la evidencia)*

4. *Se recomienda como primera elección la atorvastatina aunque también pueden valorarse pitavastatina, rosuvastatina o pravastatina como tratamiento farmacológico más seguro en prevención primaria y secundaria de la hipercolesterolemia. (Recomendación fuerte, moderada calidad de la evidencia)*

5. *Se recomiendan los fibratos como tratamiento farmacológico más eficaz de la hipertrigliceridemia grave (>500 mg/dL) refractaria a tratamiento dietético. (Recomendación fuerte, moderada calidad de la evidencia)*

6. *No se recomienda de forma sistemática el tratamiento combinado de estatina y fibratos porque favorece la toxicidad de ambos fármacos. (Recomendación fuerte, moderada calidad de la evidencia)*

7. *Se recomienda valorar la asociación de ezetimiba a estatinas ya que puede mejorar el control de la dislipemia en algunos pacientes. (Recomendación fuerte, moderada calidad de la evidencia)*

## 8. HIPERTENSIÓN ARTERIAL (HTA)

De todos los factores implicados en la mortalidad atribuible al RCV, el impacto que genera la HTA en la mortalidad es mayor que el del tabaquismo, el IMC elevado o la hipercolesterolemia<sup>76</sup>. No disponemos de suficiente evidencia que demuestre que la infección por VIH se asocie a un mayor riesgo de HTA. Por ello, se asume que la monitorización, las implicaciones clínicas y el tratamiento deben ser similares a la población general, teniendo en cuenta las interacciones entre el TAR y el fármaco antihipertensivo.

### 8.1. Relación entre presión arterial (PA) y daño cardiovascular y renal

La relación existente entre PA y las complicaciones cardiovasculares (CV) y renales se ha analizado en un amplio número de estudios observacionales<sup>77</sup>. Tanto la PA medida en la consulta como fuera de ella, conlleva una relación independiente entre la incidencia de complicaciones CV graves, muerte súbita, insuficiencia cardiaca (IC) y enfermedad arterial periférica (EAP), así como con la enfermedad renal en estadio terminal<sup>77</sup>. Esto es cierto para todas las edades y todos los grupos étnicos<sup>78-79</sup>. Estos mismos datos indican que la presión arterial sistólica (PAS) es un predictor de complicaciones más potente que la presión arterial diastólica (PAD) a partir de los 50 años de edad<sup>80</sup>. En pacientes con el VIH tanto la prehipertensión como la HTA se asocian con un mayor riesgo de IAM según datos de la cohorte de veteranos<sup>80</sup>.

### 8.2. Prevalencia y factores asociados

La prevalencia de HTA en la población general es del 30-45%, con un marcado aumento en las edades más avanzadas, mientras que se estima que la prevalencia de HTA en pacientes con el VIH es del 15-25%, siendo aproximadamente equivalente a la que se observa en la población general con 10-15 años más de edad<sup>81</sup>.

Se han comunicado como factores asociados con HTA en pacientes con el VIH la cifra de linfocitos CD4 baja, mayor edad, género masculino, mayor IMC, lipodistrofia, síndrome metabólico (SM), índice cintura-cadera aumentado, DM, obesidad central o CT elevado. No hay evidencia de que el TAR influya sobre el riesgo de HTA en pacientes con el VIH<sup>82</sup>.

### 8.3. Estratificación del riesgo cardiovascular

La estimación del riesgo CV total resulta sencilla en determinados subgrupos de pacientes, como aquellos con antecedentes de ECV, DM o con FRCV muy elevados. Sin embargo, un elevado número de pacientes no pertenecen a ninguna de las categorías mencionadas por lo que se requiere del uso de modelos de estimación del riesgo CV total, como son los distintos métodos automatizados de estimación del riesgo. De esta manera se podrá ajustar la estrategia terapéutica (Tabla 15).

### 8.4. Evaluación diagnóstica

- **Determinación de la presión arterial**

Para establecer el diagnóstico de HTA hay que medir correctamente la PA. Para ello, el paciente debe estar en reposo al menos cinco minutos y realizar 2 o 3 determinaciones de la PA con una diferencia de al menos un minuto<sup>83-87</sup>. Esta medición debe combinarse siempre con la medición de la frecuencia cardiaca, ya que es un predictor independiente de complicaciones CV<sup>84</sup>.

La PA fuera de consulta se suele obtener por automedición o por monitorización ambulatoria (AMPA y MAPA respectivamente) lo que nos permite obtener un gran número de mediciones fuera del ambiente médico, que representan con mayor fiabilidad la PA real. La AMPA se relaciona más estrechamente con el daño orgánico inducido por HTA que la medida en consulta, especialmente en la hipertrofia del ventrículo izquierdo (VI). Asimismo, se ha demostrado de forma consistente que el promedio de la PA de 24 horas tiene una relación más estrecha con las complicaciones mórbidas y mortales que la PA en consulta<sup>85</sup>. Es recomendable realizar una monitorización ambulatoria de la presión arterial (MAPA) cuando existan discrepancias en las medidas de la PA, para realizar el diagnóstico de HTA de bata blanca o de HTA enmascarada y en casos de HTA refractaria<sup>83-87</sup>.

La medición correcta de la PA debe ser una práctica rutinaria en la atención a los pacientes con infección por VIH<sup>87</sup>. Se recomienda realizarla en la visita inicial y posteriormente una vez al año si las cifras son normales (PAS <130 mmHg y PAD <85 mmHg) y con mayor periodicidad si están en el límite alto de la normalidad (PAS 130-139 mmHg o PAD 85-89 mmHg) o si existen otros factores de riesgo cardiovascular.

- **Historia médica**

La historia médica debe incluir la fecha del diagnóstico de HTA, mediciones de la PA y el tratamiento antihipertensivo actual y pasado. Debe prestarse especial atención a las indicaciones de las causas secundarias de la HTA. Debe preguntarse a las mujeres por la HTA relacionada con la gestación. Se debe elaborar cuidadosamente la historia CV de todos los pacientes, ya que permitirá evaluar el RCV total, e incluir las enfermedades concomitantes.

- **Evaluación Clínica**

Un adecuado examen físico permitirá establecer o verificar el diagnóstico de HTA, establecer la PA actual, cribar posibles causas secundarias y mejorar la estimación del RCV total.

- **Pruebas de laboratorio**

Las pruebas de laboratorio tienen como objetivo obtener evidencia de la presencia de factores de riesgo adicionales, buscar las causas de la HTA secundaria y descartar la presencia de daño orgánico. La tabla 16 resume las determinaciones a realizar en pacientes VIH con HTA<sup>87,88</sup>.

- **Búsqueda de daño orgánico asintomático**

Disponemos de suficiente evidencia sobre el papel crucial del daño orgánico asintomático

en la determinación del RCV de sujetos con y sin PA alta. Cualquiera de los marcadores de daño orgánico -microalbuminuria, aumento de la velocidad de la onda de pulso (PWV), hipertrofia ventricular izquierda y ateromatosis carotídea— puede predecir la mortalidad CV independientemente de la estratificación automatizada del riesgo lo que refuerza la necesidad de evaluación del daño orgánico en la práctica clínica diaria<sup>89</sup>.

## 8.5. Tratamiento

La evidencia actual sustenta la recomendación de inicio de tratamiento en la población general menor de 60 años con la finalidad de disminuir la PAS por debajo de 140 mmHg y la PAD por debajo de 90 mmHg, *excepto para pacientes con DM, donde se recomiendan valores <85 mmHg*. En mayores de 60 años, se recomienda el tratamiento cuando la PAS sea  $\geq 160$  mmHg o si es de 140-159 mmHg, siempre que sea bien tolerado. La estrategia terapéutica debe tener en cuenta el riesgo CV total, además de los niveles de PA, para maximizar el coste-efectividad del manejo de la HTA<sup>85</sup> como podemos apreciar en la tabla 17. Todos los pacientes con HTA grado 2 o 3 son candidatos al mismo<sup>90-91</sup>.

A todos los hipertensos se les ha de dar instrucciones relativas a los hábitos de vida, que incluyan el abandono del tabaco, reducción de peso, reducción del consumo de alcohol, ejercicio físico, reducción del aporte de sal, aumento del consumo de frutas y verduras y disminución de las grasas saturadas y totales<sup>92-94</sup>.

El mayor beneficio del tratamiento es la reducción de la PA *per se* y dichos beneficios son en gran medida independientes del fármaco que se utilice. La evidencia indica que iniciar tratamiento con diuréticos tiazídicos, IECA, ARA II y antagonistas del calcio reducen de forma adecuada la PA y el RCV. Los betabloqueantes no se recomiendan como tratamiento de inicio por los datos que le asocian con mayor riesgo de problemas cardiovasculares e ictus.

Se preferirán los fármacos con efecto durante 24 horas y administración en dosis única porque favorecen el cumplimiento terapéutico<sup>83</sup>. La monoterapia reduce eficazmente la PA en un limitado número de pacientes, por lo que, la mayoría requieren combinaciones para conseguir un adecuado control. La monoterapia estaría indicada en

pacientes con HTA leve y RCV total bajo o moderado. Se preferirá una combinación en dosis bajas con PA inicial en grado 2 o 3 o con un RCV alto o muy alto. Las combinaciones han demostrado una mayor reducción de la PA que el doblar dosis de un solo agente. No debemos olvidar que, al menos un 15-20% de los pacientes necesitan más de dos fármacos para conseguir una reducción efectiva<sup>83</sup>. Hay evidencia de que, en individuos de alto riesgo, el control de la PA es más difícil y requiere más frecuentemente la combinación de fármacos antihipertensivos con otros tratamientos, como el tratamiento hipolipemiante intensivo. La única combinación que no puede recomendarse según los resultados de estudios es la de dos bloqueadores del sistema renina-angiotensina distintos

A la hora de decidir qué fármaco antihipertensivo emplear, deberemos considerar diversos factores relacionados con las vías metabólicas del TAR y de los distintos antihipertensivos, ya que existen potenciales interacciones farmacológicas o efectos tóxicos que limitan su uso<sup>95-98</sup>. Las interacciones más esperadas ocurren entre ITINN, IPs y EVG potenciado con cobicistat por sus interacciones con el grupo del CYP P450, siendo poco probables con ITIAN, RAL, DTG o MVC<sup>99-100</sup>

Los inhibidores de la enzima convertidora de angiotensina (IECA) y los antagonistas de los receptores de angiotensina II (ARA II), son los antihipertensivos mejor tolerados y con menor riesgo de interacciones con los fármacos antirretrovirales (Ver [www.hiv-druginteractions.org](http://www.hiv-druginteractions.org)). Los diuréticos tiazídicos y el amlodipino en general también son seguros y se pueden utilizar en determinadas situaciones clínicas (tabla 18), si no se pueden usar los anteriores (IECA o ARA II) o si es necesario tratamiento combinado de la HTA. En caso de uso de tratamientos con fármacos potenciados con cobicistat o ritonavir el único antagonista del calcio que se puede usar, y con precaución, es amlodipino.

Deberemos tener en cuenta que BB, en especial combinados con diurético, tienden a aumentar el peso y facilitan la aparición de DM. Un algoritmo de tratamiento del paciente con HTA puede ser el representado en la figura 3.

## Recomendaciones

1. *En la actualidad las recomendaciones para el diagnóstico y manejo terapéutico de la HTA en pacientes con infección por el VIH deben ser las mismas que las de la población general. Para ello se recomienda modificar el estilo de vida y si es preciso, tratamiento con antihipertensivos, con el objeto de disminuir el RCV y la morbilidad por enfermedad cardiovascular. (Recomendación fuerte, alta calidad de la evidencia)*
2. *En población  $\geq$  de 60 años se deberá iniciar tratamiento para disminuir PAS por debajo de 150 mmHg y PAD por debajo de 90 mmHg. (Recomendación fuerte, alta calidad de evidencia)*
3. *En población de edad menor a 60 años se deberá iniciar tratamiento para disminuir la PAS por debajo de 140 mmHg y la PAD por debajo de 90 mmHg. (Recomendación fuerte, alta calidad de evidencia)*
4. *A la hora de seleccionar los fármacos hipotensores en pacientes con TAR se recomienda tener en cuenta las potenciales interacciones medicamentosas y los efectos adversos. Los antihipertensivos de las familias IECA y ARA II son los mejor tolerados y con menor riesgo de interacciones. (Recomendación fuerte, alta calidad de la evidencia)*

## 9. DISFUNCIÓN SEXUAL Y ALTERACIONES HORMONALES

### 9.1. Disfunción Sexual

La prevalencia de disfunción sexual (DS) en los pacientes con infección por el VIH es superior a la de la población seronegativa para cualquier década de edad. En los varones se describe con mayor frecuencia disfunción eréctil (DE), disminución de la libido, y alteraciones de la eyaculación y del orgasmo<sup>101-105</sup>. En las mujeres son más frecuentes la disminución del deseo sexual y menor satisfacción en la relación sexual<sup>104</sup>.

Entre los factores implicados en esta disfunción se incluyen: la edad, el hipogonadismo, factores psicológicos, presencia de comorbilidades (HTA, ECV, SM, obesidad, hepatopatía, disfunción

autonómica y neuropatía), fármacos (anti- hipertensivos, diuréticos, hipolipemiantes, antidepresivos, benzodiacepinas, anti- psicóticos, ketoconazol, fluconazol, ganciclovir, megestrol, metadona, cimetidina), y el consumo de drogas y alcohol<sup>105</sup>.

En la DE la edad y los trastornos psicológicos y psiquiátricos, fundamentalmente la depresión y algunos de sus tratamientos, son los factores más frecuentemente implicados<sup>102-103</sup>. En los estudios más recientes, incluyendo los más modernos IP (DRV, ATV) o los inhibidores de la integrasa (RAL)<sup>103</sup>, no se ha establecido una relación directa entre la DE y los FARV de uso frecuente actual.

#### **9.1.1. Evaluación y Diagnóstico**

La evaluación de la DS en la práctica clínica habitual puede verse limitada por falta de tiempo, incomodidad de médico y paciente para hablar del tema, dificultades diagnósticas, falta de unidades de evaluación específica y limitaciones en las opciones de tratamiento. La evaluación diagnóstica y terapéutica de la mujer es más compleja que la del hombre<sup>101,102</sup>.

La evaluación inicial debe incluir una anamnesis y una exploración física para detectar la presencia de hipogonadismo, co-morbididades y posibles fármacos implicados, una valoración psicológica, y una analítica general que incluya el perfil lipídico y metabólico y determinaciones de estradiol y testosterona, preferiblemente la determinación del cociente testosterona libre/testosterona total, ya que en los pacientes con infección por el VIH pueden estar aumentados los niveles de globulinas ligadoras de las hormonas sexuales resultando en valores falsamente normales de los niveles de testosterona total. Si se detecta hipogonadismo, se determinarán también las gonadotropinas y la prolactina<sup>105</sup>. Para la evaluación de la DE se dispone de cuestionarios validados (el IIEF-15, la versión abreviada IIEF-5 y la adaptada a varones homosexuales)<sup>101,105</sup>.

En las mujeres la mayoría de las causas de DS son psicológicas y emocionales.



### 9.1.2. Tratamiento

Dependerá de los factores implicados identificados. En el hombre, si se detecta hipogonadismo se debe hacer una terapia sustitutiva con testosterona aplicando las guías de tratamiento de la población general.

En la DE pueden evaluarse los inhibidores de la fosfodiesterasa-5 (sildenafil, vardenafil y tadalafilo)<sup>101,104</sup>. El uso conjunto de estos fármacos con IP potenciados con ritonavir o cobicistat y EVG-cobicistat puede elevar sustancialmente los niveles de los primeros, lo que obliga a una reducción sustancial de la dosis (Tabla 19). Los inhibidores de la fosfodiesterasa-5 están contraindicados en pacientes con infección por el VIH que tomen nitratos porque pueden potenciar sus efectos hipotensores. Los ajustes de dosis necesarios en la asociación de los inhibidores de la fosfodiesterasa-5 con los FARV se detallan en la tabla 19. Si no hay una causa evidente de DE o el tratamiento con inhibidores de la fosfodiesterasa resulta ineficaz, debe remitirse al paciente al especialista<sup>105</sup>. La Figura 4 muestra un algoritmo para el tratamiento del paciente con infección por el VIH con DE.

En la mujer, los estrógenos tópicos mejoran la dispareunia asociada a la atrofia vulvo-vaginal en las mujeres menopáusicas, pero no hay datos concluyentes sobre el papel de los estrógenos sistémicos o de la testosterona.

### **Recomendaciones**

- 1. La evaluación de la DS debe formar parte de la atención integral de los pacientes con infección por el VIH por su elevada prevalencia. (Recomendación fuerte, baja calidad de la evidencia)*
- 2. Si se utilizan los inhibidores de la fosfodiesterasa-5 deben tenerse en cuenta las interacciones con los fármacos antirretrovirales, especialmente con los fármacos potenciados con ritonavir y cobicistat. (Recomendación fuerte, moderada calidad de la evidencia).*

### 9.2. Alteraciones hormonales

Las alteraciones hormonales pueden ser causadas por efecto directo del VIH sobre los órganos endocrinos (especialmente en estadios avanzados de la infección), por efecto sistémico mediado por citoquinas, por infecciones y neoplasias oportunistas asociadas al VIH, por los fármacos utilizados en su tratamiento, o por el consumo de drogas<sup>106,107</sup>.

En los pacientes con infección por el VIH en TAR se han descrito varias endocrinopatías autoinmunes: enfermedad de Graves-Basedow en relación con el Síndrome de Reconstitución Inmune<sup>107,108</sup>, y síndrome de Cushing iatrogénico y disfunción del eje hipotálamo-hipófisis-adrenales por la co-administración de glucocorticoides exógenos e IP potenciados con ritonavir o cobicistat<sup>107,109,110</sup>.

La evaluación hormonal debe ser individualizada y guiada por la clínica<sup>106,107</sup>. En muchas ocasiones los síntomas son inespecíficos y comunes a la propia infección por el VIH y a las enfermedades asociadas, y requiere de un alto nivel de sospecha para su diagnóstico.

No se recomienda la medición rutinaria de las hormonas, excepto en los casos en que exista indicación clínica por hipo o hiperfunción. Las recomendaciones de tratamiento son similares a las de la población general<sup>106-107</sup>.

### **Recomendación**

*1. Las recomendaciones de tratamiento hormonal en los pacientes con infección por el VIH son limitadas y deben aplicarse las recomendaciones generales utilizadas en la población general no infectada por este virus. (Recomendación fuerte, muy bajo nivel de evidencia)*

## **10. REPERCUSIÓN HEPÁTICA DE LAS ALTERACIONES METABÓLICAS. ESTEATOSIS.**

La infección por el VIH y determinados FARV producen efectos adversos similares a los observados en el síndrome metabólico, entre los que se incluye la esteatosis hepática. Su prevalencia en pacientes VIH positivos es del 30 al 50%<sup>111,112</sup>.

La obesidad y sobre todo la resistencia a la insulina es un factor patogénico clave<sup>113,114</sup>. La infección por virus de hepatitis C y el abuso de alcohol son relativamente prevalentes en pacientes con el VIH y pueden influir en la patogenia. La esteatosis no suele ocasionar síntomas *per se*. El diagnóstico de laboratorio muestra habitualmente una elevación de transaminasas en una cuantía inferior a cinco veces los valores normales con GPT>GOT, elevación de GGT y fosfatasa alcalina. También pueden estar presentes otras manifestaciones del síndrome metabólico, como las alteraciones de los lípidos. La ecografía es el método confirmatorio de elección, y ayuda a conocer si existen otros problemas hepáticos o extrahepáticos<sup>115-116</sup>. Tiene una sensibilidad muy alta con la presencia de infiltración grasa superior al 20-30% del tejido hepático. Otros métodos diagnósticos son la RMN con una sensibilidad muy elevada para infiltración grasa superior al 5%, pero con un mayor coste<sup>117</sup> y la elastografía con atenuación controlada. En ensayos clínicos se ha utilizado la resonancia magnética de imagen y espectroscópica, con una elevada sensibilidad<sup>118</sup>. No existen métodos de imagen capaces de distinguir entre esteatosis y esteatohepatitis.

Se están investigando métodos bioquímicos para el diagnóstico de esteatohepatitis, pero en estos momentos el diagnóstico de certeza se basa en la confirmación histológica.

El pronóstico de la esteatosis hepática es en general benigno<sup>119-121</sup>. Al igual que en la población general: es importante distinguir este cuadro de la esteatohepatitis, que se presenta en pacientes con obesidad visceral e insulinresistencia, así como con otras manifestaciones clínico-biológicas que se encuentran en el síndrome metabólico. Se han establecido los siguientes factores de riesgo para el desarrollo de esteatohepatitis: obesidad central, HTA, dislipemia, DM tipo 2 o SM, sobre todo en presencia de infiltración grasa superior al 33%<sup>115</sup>. Estos pacientes tienen un riesgo considerable de progresión del daño hepático y de desarrollo de cirrosis y hepatocarcinoma. Los pacientes con esteatosis y sobre todo con esteatohepatitis tienen un riesgo aumentado de mortalidad en relación con la comorbilidad y el daño hepático avanzado<sup>122</sup>

La DM debe de tener una consideración especial, ya que ha demostrado que se asocia con un

mayor riesgo de desarrollo de hepatocarcinoma y el beneficio relacionado con un buen control metabólico<sup>123-124</sup>. En un estudio retrospectivo con 4302 pacientes asiáticos seguidos 8 años, la incidencia de hepatocarcinoma, con A1c <7%, el *Hazard Ratio* (HR) era del 0,56 (IC95%: 0,33-0,89)<sup>124</sup>.

El tratamiento incluye la modificación de los hábitos dietéticos si están alterados y la pérdida ponderal de al menos un 10%. Se ha demostrado el beneficio histológico de la pérdida de peso tanto en la esteatosis hepática como en la esteatohepatitis, en la primera de forma proporcional a la pérdida de peso<sup>125,126</sup>. Si existen alteraciones metabólicas como DM o dislipemia o infección por virus de hepatitis crónicas, se deberán tratar específicamente. La eliminación de la infección por VHC genotipo 3, se asocia con una mejoría

significativa en la esteatosis, no en otros genotipos ni sin respuesta viral sostenida<sup>127</sup>.

Si no existen alteraciones de hábitos de vida o metabólicas, o su tratamiento específico no es suficientemente eficaz, podría considerarse tratamiento con vitamina E durante 1-2 meses aunque los datos disponibles son limitados<sup>128-130</sup>. Las dietas ricas en ácidos grasos omega-3 parecen mejorar la esteatosis así como los niveles de transaminasas<sup>131</sup>.

Ningún fármaco ha sido evaluado en ensayos en fase III, ni aprobado por agencias reguladoras, los tamaños muestrales de los estudios son reducidos y en algunos casos hay dudas sobre sus efectos secundarios. Entre los antidiabéticos orales la pioglitazona ha demostrado beneficio frente a placebo, pero puede producir aumento de peso, alteraciones de la densidad ósea y existe controversia sobre el riesgo aumentado de neoplasias vesicales. El derivado de los ácidos biliares, ácido obeticólico también ha demostrado beneficio histológico en esteatohepatitis en un ensayo clínico, pero produce prurito y no se conoce su seguridad a largo plazo<sup>132</sup>.

Recientemente otro ensayo clínico con liraglutida, un análogo del glucagón objetiva la resolución de esteatohepatitis pero el tamaño muestral es reducido<sup>133</sup>.

### **Recomendaciones**

1. *Se recomienda descartar esteatosis hepática en pacientes diabéticos o con síndrome metabólico y con elevación de transaminasas sin etiología definida. (Recomendación fuerte, bajo nivel de evidencia)*
2. *En el paciente con factores de riesgo para la progresión de esteatosis hepática, se deben tomar medidas para el diagnóstico y tratamiento precoz para prevenir la progresión del daño hepático. (Recomendación fuerte, bajo nivel de evidencia)*
3. *Para la confirmación diagnóstica, se recomienda la realización al menos de un método por imagen. (Recomendación fuerte, moderado nivel de evidencia)*
4. *El tratamiento se dirige a modificar hábitos de vida no saludables y tratar adecuadamente la diabetes o dislipemia si existen. (Recomendación fuerte, moderado nivel de evidencia)*
5. *En pacientes con esteatosis o esteatohepatitis, se recomienda una pérdida de peso de al menos el 10%. (Recomendación fuerte, moderado nivel de evidencia)*

## 11. BIBLIOGRAFÍA

1. Guyatt GH, Oxman AD, Kunz R, et al., Going from evidence to recommendations. BMJ. 2008; 336:1049-51.
2. Guyatt GH, Oxman AD, Vist GE, et al., GRADE: an emerging consensus on rating quality of evidence and strength of recommendations. BMJ. 2008; 336: 924-6.
3. Jaeschke R, Guyatt GH, Dellinger P, et al., Use of GRADE grid to reach decisions on clinical practice guidelines when consensus is elusive. BMJ. 2008; 337:744.
4. Guyatt GH, Oxman AD, Kunz R, et al., Incorporating considerations of resources use into grading recommendations. BMJ. 2008; 336:1170-3.G.
5. Guyatt; AD Oxman; E A Akl; R Kunz; G Vist, J Brozek et al. GRADE guidelines: Introduction-GRADE evidence profiles and summary of findings tables. Journal of clinical epidemiology 2011;64:383-394.
6. Von Wichmann MA, Locutura J, Blanco JR, Riera M, Suárez-Lozano I, Saura RM, et-al, Grupo de Estudio del Sida (GESIDA). Indicadores de calidad asistencial de GESIDA para la atención de personas infectadas por el VIH/sida. Enferm Infecc Microbiol Clin. 2010;

28(Supl 5):1-88.

7. European AIDS Clinical Society (EACS) guidelines on the prevention and management of metabolic diseases in HIV. Disponible en: <http://www.eacsociety.org/files/guidlines-8.0-spanish.pdf> Último acceso 30 de julio de 2016.

8. Documento de consenso de Gesida/Secretaría del Plan Nacional sobre el Sida respecto al tratamiento antirretroviral en adultos infectados por el virus de la inmunodeficiencia humana (Actualización de Enero de 2016). Disponible en: <http://www.gesida-seimc.org/contenidos/guiasclinicas/2016/gesida-guiasclinicas-2016-tar.pdf> Último acceso 30 de julio de 2016.

9. Perk J, De Backer G, Gohlke H, Graham I, Reiner Z, Verschuren M et al. European Guidelines on cardiovascular disease prevention in clinical practice (version 2012). *European Heart Journal* 2012; 33, 1635–1701

10. Martín-Iguacel R, Llibre JM, Friis-Moller N. Risk of cardiovascular disease in an aging HIV population: where are we now? *Curr HIV/AIDS Rep* 2015;12:375-387.

11. Kaplan-Lewis E, Aberg JA, Lee M. Atherosclerotic cardiovascular disease and antiretroviral therapy. *Curr HIV/AIDS Rep* 2016;13:297-308.

12. Ballocca F, Gili S, D'Ascenzo F, Marra WG, Cannillo M, Calcagno A, et al. HIV infection and primary prevention of cardiovascular disease: lights and shadows in the HAART Era. *Prog Cardiovasc Dis* 2016;58:565-576.

13. d'Ettorre G, Ceccarelli G, Pavone P, Vittozzi P, De Girolamo G, Schietroma I, et al. What happens to cardiovascular system behind the undetectable level of HIV viremia? *AIDS Res Ther* 2016;13:21 doi: 10.1186/s12981-016-0105-z. eCollection 2016.

14. da Cunha J, Maselli LM, Stern AC, Spada C, Bydlowski SP. Impact of antiretroviral therapy on lipid metabolism of human immunodeficiency virus-infected patients: old and new drugs. *World J Virol* 2015;4:56-77.

15. Panel de expertos de Gesida y Plan Nacional sobre el Sida. Documento de consenso de Gesida/Plan nacional sobre el sida respecto al tratamiento antirretroviral en adultos infectados por el virus de la inmunodeficiencia humana (actualización enero de 2016). *Enferm Infecc Microbiol Clin* 2016;34:439-451.

16. Krikke M, Hoogeveen RC, Hoepelman AI, Visseren FL, Arends JE. Cardiovascular risk prediction in HIV-infected patients: comparing the Framingham, atherosclerotic cardiovascular disease risk score (ASCVD), Systematic Coronary Risk Evaluation for the Netherlands (SCORE-NL) and Data Collection on Adverse Events of Anti-HIV Drugs (D:A:D) risk prediction models. *HIV Med* 2016;17:289-297.

17. Friis-Moller N, Ryom L, Smith C, Weber R, Reiss P, Dabis F, et al, on behalf of the D:A:D study group. An updated prediction model of the global risk of cardiovascular disease in HIV-positive persons: The Data-collection on Adverse Effects of Anti-HIV Drugs (D:A:D) study. *Eur J Prev Cardiol* 2016;23:214-223.

18. Estrada V, Palacios R, Serrano S, Galindo MJ, Dueñas C, Marrugat J, on behalf of the COMVIH Group. A calibration of the Framingham Coronary Risk Function adapted to the characteristics of Spanish HIV-infected patients. 15th European AIDS Conference. October 21 - 24, 2015, Barcelona, Spain; PE15/21.
19. Eckard AR, McComsey GA. The role of statins in the setting of HIV infection. *Curr HIV/AIDS Rep* 2015;12:305-312.
20. Smith T, Hutchison P, Schrör K, Clària J, Lanas A, Patrignani P, et al. Aspirin in the 21st century-common mechanisms of disease and their modulation by aspirin: a report from the 2015 scientific conference of the international aspirin foundation, 28 august, London, UK. *Ecanermedicalscience* 2015;9:581. doi: 10.3332/ecancer.2015.581. eCollection 2015.
21. Food and Drug Administration. FDA Allows Qualified Health Claim to Decrease Risk of Coronary Heart Disease. Available online. Accessed May 26, 2006
22. Panagiotakos DB, Pitsavos C, Polychronopoulos E, Chrysohou C, Zampelas A, Trichopoulos A. Can a Mediterranean diet moderate the development and clinical progression of coronary heart disease? A systematic review. *Med Sci Monit* 2004; 10:193-8.
23. Esposito K, Marfella R, Ciotola M, Di Palo C, Giugliano F, Giugliano G et al. Effect of a Mediterranean-Style Diet on Endothelial Dysfunction and Markers of Vascular Inflammation in the Metabolic Syndrome. *JAMA* 2004; 292:1440-6
24. A Nationwide Framework for Surveillance of Cardiovascular and Chronic Lung Diseases July 22, 2011. Disponible en: <http://www.iom.edu/~media/Files/Report%20Files/2011/A-Nationwide-Framework-for-Surveillance-of-Cardiovascular-and-Chronic-Lung-Diseases/National%20Surveillance%20Systems%202011%20Report%20Brief.pdf>
25. Urpi-Sarda M, Casas R, Chiva-Blanch G et al. The Mediterranean diet pattern and its main components are associated with lower plasma concentrations of tumor necrosis factor receptor 60 in patients at high risk for cardiovascular disease. *J Nutr.* 2012;142(6):1019-25.
26. Estruch R, Ros E, Salas-Salvadó J, Covas MI, Corella D, Arós F, et al PREDIMED Study Investigators. Primary prevention of cardiovascular disease with a Mediterranean diet. *N Engl J Med.* 2013;368(14):1279-90)
27. Sureda A, Del Mar Bibiloni M, Martorell M, Buil-Cosiales P, Marti A, Pons A, Tur JA, Martinez-Gonzalez MÁ. Mediterranean diets supplemented with virgin olive oil and nuts enhance plasmatic antioxidant capabilities and decrease xanthine oxidase activity in people with metabolic syndrome: The PREDIMED study. *Mol Nutr Food Res* 2016. doi: 10.1002/mnfr.201600450. [Epub ahead of print].
28. Banegas, José R.; Díez-Gañán, Lucía; Bañuelos-Marco, Beatriz; González-Enríquez, Jesús; Villar-Álvarez, Fernando; Martín-Moreno, José M.; Córdoba-García, Rodrigo; Pérez-Trullén, Alfonso; Jiménez-

- Ruiz, Carlo. Mortalidad atribuible al consumo de tabaco en España en 2006. *Med Clin (Barc)* 2011;136(3):97-102.
- 29.Helleberg M(1), May MT, Ingle SM, Dabis F, Reiss P, Fätkenheuer G, Costagliola D, d'Arminio A, Cavassini M, Smith C, Justice AC, Gill J, Sterne JA, Obel N. Smoking and life expectancy among HIV-infected individuals on antiretroviral therapy in Europe and North America. *AIDS*. 2015;29(2):221-9
- 30.Pedrol E, Deig E, Ribell M, Vidal I, García P, Soler A. Uso de bupropión en la deshabituación tabáquica en pacientes infectados por el VIH en tratamiento antirretroviral. *Enferm Infecc Microbiol Clin* 2004; 24: 508-511.
- 31.Task Force on Community Preventive Services. Recommendations to increase physical activity in communities. *Am J Prev Med* 2002;22(4 Suppl):67-72.
- 32.Camarelles Guillem F, Dalmau González-Gallarza R, Clemente Jiménez L, Díaz-Maroto Muñoz JL, Lozano Polo A, Pinet Ogué MC; grupo colaborador Comité Nacional para la Prevención del Tabaquismo (CNPT). Documento de consenso para la atención clínica al tabaquismo en España *Med Clin (Barc)*. 2013 Mar 16;140(6):272.e1-272.e12.
- 33.Foulds J. The neurobiological basis for partial agonist treatment of nicotine dependence: varenicline. *Int J Clin Pract*. 2006;60(5):571-6.
- 34.Anthenelli, RM, Benowitz, NL, West, R et al. Neuropsychiatric safety and efficacy of varenicline, bupropion, and nicotine patch in smokers with and without psychiatric disorders (EAGLES): a double-blind, randomised, placebo-controlled clinical trial. *Lancet*. 2016.
- 35.Consejo Integral en Estilo de Vida en Atención Primaria, vinculado con recursos comunitarios en población adulta.  
[http://www.msssi.gob.es/profesionales/saludPublica/prevPromocion/Estrategia/Consejo\\_integral\\_EstilosVida.htm](http://www.msssi.gob.es/profesionales/saludPublica/prevPromocion/Estrategia/Consejo_integral_EstilosVida.htm)
- 36.David B. Abrams Promise and Peril of e-Cigarettes. Can Disruptive Technology Make Cigarettes Obsolete?. *JAMA*, 2014 Volume 311, Number 2;pp:135-136.
- 37.Grupo de estudio de la OMS sobre la reglamentación de los productos del tabaco. Serie de informes técnicos de la OMS. Nº 955. ISBN 978 92 4 120955 7. Nov. 2010.
- 38.Dirección General De Salud Pública, Calidad E Innovación. Informes sobre Tabaco: Informe sobre los cigarrillos electrónicos: situación actual, evidencia disponible y regulación. Julio 2014. Disponible en: <http://www.msssi.gob.es/ciudadanos/proteccionSalud/tabaco/docs/InformeCigarrillosElectronicos.pdf>
- 39.Saumoy M, Alonso-Villaverde C, Navarro A, Olmo M, Vila R, Ramon JM, Di Yacovo S, Ferrer E, Curto J, Vernet A, Vila A, Podzamczar D. Randomized trial of a multidisciplinary lifestyle intervention in HIV-infected patients with moderate-high cardiovascular risk. *Atherosclerosis*. 2016;246:301-308
- 40.Fazeli, P.L., Marquine, M.J., Dufour, C. et al. Physical Activity is associated with better neurocognitive and everyday functioning among older adults with HIV disease. *AIDS Behav* (2015) 19: 1470-1477.
41. José María Lobos Bejarano, Enrique Galvec, Miguel Ángel Royo-Bordonada, Eduardo Alegría Ezquerro, Pedro Armario et al. Posicionamiento del Comité Español Interdisciplinario de Prevención
- DOCUMENTO DE CONSENSO SOBRE ALTERACIONES METABÓLICAS Y RIESGO CARDIOVASCULAR  
EN PACIENTES CON INFECCIÓN POR EL VIH



Cardiovascular y la Sociedad Española de Cardiología en el tratamiento de las dislipemias. Divergencia entre las guías europea y estadounidense. *Hipertens Riesgo Vasc.* 2015;32(2):83---91.

42. Grupo de Expertos del Grupo de Estudio sobre Alteraciones Metabólicas (GEAM), de la Secretaría del Plan Nacional sobre el sida (SPNS) y del Grupo de Estudio de sida (GeSIDA). Alteraciones de la distribución de la grasa corporal. Documento de consenso sobre alteraciones metabólicas y riesgo cardiovascular en pacientes con infección por el VIH (Febrero 2014). Disponible en:

[http://www.msssi.gob.es/ciudadanos/enfLesiones/enfTransmisibles/sida/publicaciones/profSanitarios/docAlteracionesMetabolicas\\_Feb2014.pdf](http://www.msssi.gob.es/ciudadanos/enfLesiones/enfTransmisibles/sida/publicaciones/profSanitarios/docAlteracionesMetabolicas_Feb2014.pdf)

43. Domingo P, Estrada V, Lopez-Aldegue J, Villaroya F, Martinez E. Fat redistribution syndromes associated with HIV-1 infection and combination antiretroviral therapy. *AIDS Rev* 2012; 14:112-23.

44. Jemsek JG, Arathoon E, Arlotti M, Perez C, Sosa N, Pokrovskiy V, et al. Body fat and other metabolic effects of atazanavir and efavirenz, each administered in combination with zidovudine plus lamivudine, in antiretroviral-naïve HIV-infected patients. *Clin Infect Dis* 2006; 42:273–80.

45. Martínez E, Conget I, Lozano L, Casamitjana R, Gatell JM. Reversion of metabolic abnormalities after switching from HIV-1 protease inhibitors to nevirapine. *AIDS* 1999; 13:805–10.

46. Fisac C, Fumero E, Crespo M, Roson B, Ferrer E, Virgili N, et al. Metabolic benefits 24 months after replacing a protease inhibitor with abacavir, efavirenz or nevirapine. *AIDS* 2005; 19:917–25.

47. McComsey GA, Moser C, Currier J, Ribaud HJ, Paczuski P, Dubé MP, et al. Body Composition Changes after Initiation of Raltegravir or Protease Inhibitors: ACTG A5260s. *Clin Infect Dis* 2016; 62:853-62.

48. Driscoll SD, Meininger GE, Lareau MT, Dolan SE, Killilea KM, Hadigan CM, et al. Effects of exercise training and metformin on body composition and cardiovascular indices in HIV-infected patients. *AIDS* 2004; 18:465–73.

49. Hadigan C, Yawetz S, Thomas A, Havers F, Sax PE, Grinspoon S. Metabolic effects of rosiglitazone in HIV lipodystrophy: a randomized, controlled trial. *Ann Intern Med* 2004; 140:786–94.

50. Falutz J, Mamputu J-C, Potvin D, Moyle G, Soulban G, Loughrey H, et al. Effects of tesamorelin (TH9507), a growth hormone-releasing factor analog, in human immunodeficiency virus-infected patients with excess abdominal fat: a pooled analysis of two multicenter, double-blind placebo-controlled phase 3 trials with safety extensions. *J Clin Endocrinol Metab* 2010; 95:4291–304.

51. Piliero PJ, Hubbard M, King J, Faragon JJ. Use of ultrasonography-assisted liposuction for the treatment of human immunodeficiency virus-associated enlargement of the dorsocervical fat pad. *Clin Infect Dis* 2003; 37:1374–7.

52. Hadigan C, Kattakuzhy S. Diabetes mellitus type 2 and abnormal glucose metabolism in the setting of human immunodeficiency virus. *Endocrinol Metab Clin North Am* 2014 Sep;43(3):685-696.
53. Tripathi A, Liese AD, Jerrell JM, Zhang J, Rizvi AA, Albrecht H, et al. Incidence of diabetes mellitus in a population-based cohort of HIV-infected and non-HIV-infected persons: the impact of clinical and therapeutic factors over time. *Diabet Med* 2014 Oct;31(10):1185-1193.
54. Willig AL, Overton ET. Metabolic Complications and Glucose Metabolism in HIV Infection: A Review of the Evidence. *Curr HIV/AIDS Rep* 2016 Oct;13(5):289-296.
55. Herrin M, Tate JP, Akgun KM, Butt AA, Crothers K, Freiberg MS, et al. Weight Gain and Incident Diabetes Among HIV-Infected Veterans Initiating Antiretroviral Therapy Compared With Uninfected Individuals. *J Acquir Immune Defic Syndr* 2016 Oct 1;73(2):228-236.
56. Worm SW, Sabin CA, Reiss P, El-Sadr W, Monforte A, Pradier C, et al. Presence of the metabolic syndrome is not a better predictor of cardiovascular disease than the sum of its components in HIV-infected individuals: data collection on adverse events of anti-HIV drugs (D:A:D) study. *Diabetes Care* 2009 Mar;32(3):474-480.
57. Reinsch N, Neuhaus K, Esser S, Potthoff A, Hower M, Brockmeyer NH, et al. Prevalence of cardiac diastolic dysfunction in HIV-infected patients: results of the HIV-HEART study. *HIV Clin Trials* 2010 May-Jun;11(3):156-162.
58. Kim PS, Woods C, Dutcher L, Georgoff P, Rosenberg A, Mican JA, et al. Increased prevalence of albuminuria in HIV-infected adults with diabetes. *PLoS One* 2011;6(9):e24610.
59. American Diabetes Association. 2. Classification and Diagnosis of Diabetes. *Diabetes Care* 2016 Jan;39 Suppl 1:S13-22.
60. European AIDS Clinical Society. Guidelines. Version 8.0, 2015:38-  
[http://www.eacsociety.org/files/2015\\_eacsguidelines\\_8\\_0-english\\_rev-20160124.pdf](http://www.eacsociety.org/files/2015_eacsguidelines_8_0-english_rev-20160124.pdf).
61. Aberg JA, Gallant JE, Ghanem KG, Emmanuel P, Zingman BS, Horberg MA, et al. Primary care guidelines for the management of persons infected with HIV: 2013 update by the HIV Medicine Association of the Infectious Diseases Society of America. *Clin Infect Dis* 2014 Jan;58(1):1-10.
62. American Diabetes Association. 7. Approaches to Glycemic Treatment. *Diabetes Care* 2016 Jan;39 Suppl 1:S52-9.
63. Zinman B, Wanner C, Lachin JM, Fitchett D, Bluhmki E, Hantel S, et al. Empagliflozin, Cardiovascular Outcomes, and Mortality in Type 2 Diabetes. *N Engl J Med* 2015 Nov 26;373(22):2117-2128.
64. Han JH, Gordon K, Womack JA, Gibert CL, Leaf DA, Rimland D, et al. Comparative Effectiveness of Diabetic Oral Medications Among HIV-Infected and HIV-Uninfected Veterans. *Diabetes Care* 2016 Sep 15.
65. HIV Drug Interactions. Liverpool University. 2016: <http://www.hiv-druginteractions.org/>

checker.

66. Dubé MP, Sprecher D, Henry W H, Aberg JA, Torriant FJ, Hodis HN, Schouten J, Levin J, Myers G, Zackin R, Nevin T, Currier JS for the Adult AIDS Clinical Trial Group Cardiovascular Disease Focus Group. *Clinical Infection Disease* 2000; 31: 1216-1224.
67. Myerson M. Lipid Management in Human Immunodeficiency Virus. *Endocrinol Metab Clin N Am* 45 (2016) 141-169
68. Currier JS. Management of cardiovascular risk (including dyslipidemia) in the HIV- infected patient. In: UpToDate, Bartlett JG (Ed), UpToDate, Waltham, MA, 2016.
69. Jellinger PS, Smith DA, Mehta AE, Ganda O, Handelsman Y, Rodbard HW, Stheperd MD, Sibel JA, The AACE Task Force for Management of Dyslipidemia and Prevention of Atherosclerosis. American Association of Clinical Endocrinologists' Guidelines for Management of Dyslipidemia and Prevention of Atherosclerosis. *Endocrine Practice* 2012; vol 18(suppl 1)1-78.
70. hivpv.org. HIV Pharmacovigilance (sede web) Copenhagen HIV Programme 2016. Disponible en <http://www.hipv.org>
71. Regicor.org. Registre Gironi del Cor 35 anys (sede web) Calculador de riesgo cardiovascular REGICOR. Versión 2.1 Abril 2012. Disponible en [www.imim.cat/ofertadeserveis/software-public/regicor/?1](http://www.imim.cat/ofertadeserveis/software-public/regicor/?1)
72. Stone NJ, Robinson J, Lichtenstein AH, Bairey Merz CN, Blum CB, Eckel RH, et al. ACC/AHA guideline on the treatment of blood cholesterol to reduce atherosclerotic cardiovascular risk in adults: A report of the American College of Cardiology/American Heart Association Task Force on Practice Guidelines. *Circulation*. 2014;24:S46-8.
73. Catapano AL, Graham I, De Backer G, et al; Authors/Task Force Members. 2016 ESC/EAS Guidelines for the Management of Dyslipidaemias: The Task Force for the Management of Dyslipidaemias of the European Society of Cardiology (ESC) and European Atherosclerosis Society (EAS). Developed with the special contribution of the European Association for Cardiovascular Prevention & Rehabilitation (EACPR). *Eur Heart J*. 2016 Aug 27. [Epub ahead of print]
74. EACS European AIDS Clinical Society Guidelines. Version 8.0 October 2015. Disponible en [http://www.eacsociety.org/files/guidelines\\_8.0-english-revised\\_20160610.pdf](http://www.eacsociety.org/files/guidelines_8.0-english-revised_20160610.pdf)
75. Sponseller CA, Kryzhanovski VA, Morgan RE et al. After 52 weeks, pitavastatin is superior to pravastatin for LDL-c lowering in patients with HIV. Presented at the 21st Conference on Retroviruses and Opportunistic Infections, Boston MA, March 3-6, 2014. Abstract 751LB.
76. Rockstroh J, Guaraldi G, Deray G. HIV and the body: a review of multidisciplinary management. *HIV Medicine* 2010; 11 (suppl 2) 1-8
77. Lewington S, Clarke R, Qizilbash N, Peto R, Collins R. Agespecific relevance of usual blood pressure to vascular mortality: a meta-analysis of individual data for ne million adults in 61 prospective studies. *Lancet* 2002;360:1903–1913.

78. Asia Pacific Cohort Studies Collaboration. Blood pressure and cardiovascular disease in the Asia Pacific region. *J Hypertens* 2003;21:707–716.
79. Brown DW, Giles WH, Greenlund KJ. Blood pressure parameters and risk of fatal stroke, NHANES II mortality study. *Am J Hypertens* 2007;20:338–341
80. Vishram JK, Borglykke A, Andreassen AH, Jeppesen J, Ibsen H, Jørgensen T, Broda G, Palmieri L, Giampaoli S, Donfrancesco C, Kee F, Mancia G, Cesana G, Kuulasmaa K, Sans S, Olsen MH; on behalf of the MORGAM Project. Impact of Age on the Importance of Systolic and Diastolic Blood Pressures for Stroke Risk: The MONICA, Risk, Genetics, Archiving and Monograph (MORGAM) Project. *Hypertension* 2012;60: 1117–1123.
81. Guaraldi G, Orlando G, Zona S, Menozzi M, Carl F, Garlassi A, Berti A, Rossi E, Roverato A, and Palella F. Premature Age-Related Comorbidities Among HIV-Infected Persons Compared With the General Population. *Clinical Infectious Diseases* 2011;53(11):1120–6
82. Martínez E, López Bernaldo de Quirós JC, Miralles C, Podzamczak D. Considerations on the increase in blood pressure among antiretroviral-naïve patients starting HAART. *AIDS*. 2007;21(3):384-6.
83. Mancia G, De Backer G, Dominiczak A, Cifkova R, Fagard R, Germano G, et al. Management of arterial hypertension of the European Society of Hypertension; European Society of Cardiology. 2013 Guidelines for the management of arterial hypertension. The Task Force for the management of arterial hypertension of the European Society of Hypertension (ESH) and the European Society of Cardiology. *European Heart Journal* (2013) 34, 2159–2219
84. B Julius S, Palatini P, Kjeldsen SE, Zanchetti A, Weber MA, McInnes GT, Brunner HR, Mancia G, Schork MA, Hua TA, Holzhauer B, Zappe D, Majahalme S, Jamerson K, Koylan N. Usefulness of heart rate to predict cardiac events in treated patients with high-risk systemic hypertension. *Am J Cardiol* 2012;109:685–692.
85. Clement DL, De Buyzere ML, De Bacquer DA, de Leeuw PW, Duprez DA, Fagard RH, Gheeraert PJ, Missault LH, Braun JJ, Six RO, Van Der Niepen P, O'Brien E; Office vs. Ambulatory Pressure Study Investigators. Prognostic value of ambulatory blood-pressure recordings in patients with treated hypertension. *N Engl J Med* 2003;348:2407–2415.
86. James PA, Oparil S, Carter BL, Cushman WC et al. 2014 Evidence-based guideline for the management of High blood Pressure in adults. Report from the Panel members Appointed to the eighth Joint National Committee on Prevention, Detection, Evaluation, and Treatment of High Blood Pressure, US Department of Health and Human Services. *JAMA*. 2014; 311(5):507-520.
87. Mancia G, Laurent S, Agabiti-Rosei E, Ambrosioni E, Burnier M, Caulfield MJ, et al. Revisión de la guía Europea de manejo de hipertensión: Documento de la Sociedad europea de Hipertensión. *Journal of Hypertension* 2009, 27:2121–2158
88. Rosendorff C, Black HR, Cannon CP, Gersh BJ, Gore J, Izzo JL Jr, et al; American Heart Association Council for High Blood Pressure Research; American Heart Association Council on Clinical Cardiology; American

Heart Association Council on Epidemiology and Prevention. Treatment of Hypertension in the Prevention and

Management of Ischemic Heart Disease: A Scientific Statement from the American Heart Association Council for High Blood Pressure Research and the Councils on Clinical Cardiology and Epidemiology and Prevention.. *Circulation*. 2007 May 29;115(21):2761-88.

89. BVolpe M, Battistoni A, Tocci G, Agabiti Rosei E, Catapano AL, Coppo R, del Prato S, Gentile S, Mannarino E, Novo S, Prisco D, Mancina G. Cardiovascular risk assessment beyond systemic coronary risk estimation: a role for organ damage markers. *J Hypertens* 2012;30:1056–1064.

90 European AIDS Clinical Society. Guidelines. Version 8.0;p.32.  
[http://www.eacsociety.org/Portals/0/Guidelines\\_Online\\_131014.pdf](http://www.eacsociety.org/Portals/0/Guidelines_Online_131014.pdf)

91. Armah K, Justice A, Oursler K, Budoff M, Brown S, Warner A, et al. The Impact of Elevated and Pre-hypertensive Systolic Blood Pressure and the Risk of Acute Myocardial Infarction in HIV+ and HIV-Veterans. Denver, CO. Abstract. CROI 2012  
March 5-8 Seattle WA

92. Thiebaut R, El-Sadr W, Friis-Moller N, Rickenbach M, Reiss P, D'arminio Monforte A et al. for the DAD Study Group Predictors of hypertension and changes of blood pressure in HIV infected patients. *Antiviral Ther* 2005; 10:811-823

93. Friis-Moller N, Thiebaut R, Reiss P, Weber R, Monforte AD, De Wit S, et al, DAF study group. Predicting the risk of cardiovascular disease in HIV-infected patients: the data collection on adverse effects of anti-HIV drugs study. *Eur J Cardiovasc Prev Rehabil* 2010; 17: 491-501.

94. Laura P. Svetkey and William L. Fan: Management of Hypertension in HIVinfected Patients (Duke University Medical Centre, 05-04-2005). Acceso el 17 de junio de 2016.

95. Palacios R, Santos J, García A, Castells E, González M. Ruiz J et al. Impact of Highly active antirretroviral therapy on blood pressure in HIV-infected patients. A prospective study in a cohort of naïve patients. *HIV Med* 2006; 7. 10-15

96. Bernardino de la Serna JI, Zamora FX, Montes ML, García Puig j, Arribas JR. . Hipertensión arterial, infección por el virus de la inmunodeficiencia humana y tratamiento antirretrovírico de gran actividad. *Enferm Infecc Microbiol Clin*.2010;28(1):32–37

97. Blanco F, San Roman J, Vispo E, López M, Salto A, Abad V, et al. Management of metabolic complications and cardiovascular risk in HIV infected-patients. *AIDS rev*. 2010; 12. 231-241.

98. Peyriere H, Eiden C, Macia JC, Reynes J. Antihypertensive drugs in patients treated with antiretrovirals. *Ann Pharmacother* 2012;46:703-9.

99. Glesby MJ, Aberg JA, Kendall MA, Fitchtembaun CJ, Hafner R, Hall S et al.

Pharmacokinetic interactions between indinavir plus ritonavir and calcium channel blockers. *Clin Pharmacol Ther* 2005;78:143-53.

100. Flockhart DA, Tanus-Santos JE . Implications of Cytochrome P450 interactions when prescribing medication for hypertension. *Arch Intern Med*. 2002;162:405-412.

101. Hart TA, Moskowitz D, Cox C, Li X, Ostrow DG, Stall RD, et al. The cumulative effects of medication use, drug use, and smoking on erectile dysfunction among men who have sex with men. *J Sex Med*. 2012;9:1106-13.

102. Hart TA, Mustanski B, Ryan DT, Gorbach PM, Stall RD, Surkan PJ, et al. Depression and sexual dysfunction among HIV-positive and HIV-negative men who have sex with men: mediation by use of antidepressants and recreational stimulants. *Arch Sex Behav*. 2015;44:399-409.

103. Wang Q, Young J, Bernasconi E, Casvani M, Vernazza P, Hirschel B, et al. Swiss HIV Cohort Study. The prevalence of erectile dysfunction and its association with antiretroviral therapy in HIV-infected men: the Swiss HIV Cohort Study. *Antivir Ther*. 2013;18:337-44.

104. Wilson TE, Jean-Louis G, Schwartz R, Golub ET, Cohen MH, Maki P, et al. HIV infection and women's sexual functioning. *J Acquir Immune Defic Syndr*. 2010;54:360-7.

105. Santi D, Brigante G, Zona S, Guaraldi G, Rochira V. Male sexual dysfunction and HIV-- a clinical perspective. *Nat Rev Urol*. 2014;11:99-109.

106. Brown TT. The effects of HIV-1 infection on endocrine organs. *Best Pract Res Clin Endocrinol Metab*. 2011;25:403-13.

107. Wren A. How best to approach endocrine evaluation in patients with HIV in the era of combined antiretroviral therapy? *Clin Endocrinol (Oxf)*. 2013;79:310-3.

108. Sheik V, Dersimonian R, Richterman AG, Porter BO, Natarajan V, Burbelo PD, et al. Graves' disease as immune reconstitution disease in HIV-positive patients is associated with naive and primary thymic emigrant CD4(+) T-cell recovery. *AIDS*. 2014;28:31-9.

109. Saberi P, Phengrasamy T, Nguyen DP. Inhaled corticosteroid use in HIV-positive individuals taking protease inhibitors: a review of pharmacokinetics, case reports and clinical management. *HIV Med*. 2013;14:519-29.

110. Hyle EP, Wood BR, Backman ES, Noubary F, Hwang J, Lu Z, et al. High frequency of hypothalamic-pituitary-adrenal axis dysfunction after local corticosteroid injection in HIV- infected patients on protease inhibitor therapy. *J Acquir Immune Defic Syndr*. 2013;63:602-8.

111. Guaraldi G, Squillace N, Stentarelli C, Orlando G, D'Amico R, Ligabue G, Fiocchi F, Zona S, Loria P, Esposito R, Palella F. Nonalcoholic fatty liver disease in infected patients referred to a metabolic clinic: prevalence, characteristics, and predictors. *Clin Infect Dis* 2008; 47: 250-7.

112. Machado MV, Oliveira AG, Cortez-Pinto H. Hepatic steatosis in patients coinfecting with human immunodeficiency virus/hepatitis C virus: a meta-analysis of the risk factors. *Hepatology* 2010; 52: 71-8.

113. Perez-Aguilar F. Etiopatogenia de la esteatohepatitis no alcohólica. *Gastroenterol Hepatol*

2005; 28: 396-406.

114. Jacobs JE, Birbaum BA, Shapiro MA, Langlotz CP, Slosman F, Rubesin SE, Horii SC.

Diagnostic criteria for fatty infiltration of the liver on contrast-enhanced helical CT. *AJR Am J Roentgenol* 1998; 171: 659-64.

115. Saadeh S, Younossi ZM, Remer EM, Gramlich T, Ong JP, Hurley M, et al. The utility of radiological imaging in nonalcoholic fatty liver disease. *Gastroenterology* 2002; 123: 745-50.

116. Shimada M, Hashimoto E, Kaneda H, Noguchi S, Hayashi N. Nonalcoholic steatohepatitis: risk factors for liver fibrosis. *Hepatol Research* 2002; 24: 429-38.

117. Crespo J, Fernández-Gil P, Hernández-Guerra M, et al. Are there predictive factors of severe liver fibrosis in morbidly obese patients with non-alcoholic steatohepatitis? *Obes Surg* 2001; 11: 254-7.

118. Kawaguchi T, Ide T, Taniguchi E, et al. Clearance of HCV improves insulin resistance, beta- cell function, and hepatic expression of insulin receptor substrate 1 and 2. *Am J Gastroenterol* 2007; 102: 570-6.

119. Adams LA, Lymp JF, St Sauver J, Sanderson SO, Lindor KD, Feldtstein A, et al. The natural history of nonalcoholic fatty liver disease: a population-based cohort study. *Gastroenterology* 2005; 129: 113-121.

120. Marchesini G, Brizi M, Bianchi G, Tomasselli S, Zoll M, Melchionda N. Metformin in non- alcoholic steatohepatitis. *Lancet* 2001; 358: 893-4.

121. Sanyal AJ, Chalasani N, Kowdley KV, McCullough A, Diehl AM, Bass NM et al. Pioglitazone, vitamin E, or placebo for nonalcoholic steatohepatitis. *N Engl J Med* 2010; 362:1675-1685.

122. Adams LA, Lymp JF, St Sauver J, Sanderson SO, Lindor KD, Feldtstein A, et al. The natural history of nonalcoholic fatty liver disease: a population-based cohort study. *Gastroenterology* 2005; 129: 113-121.

123. Dyal HK, Aguilar M, Bartos G, Holt EW, Bhuket T, Liu B, et al. Diabetes Mellitus Increases Risk of Hepatocellular Carcinoma in Chronic Hepatitis C Virus Patients: A Systematic Review. *Dig Dis Sci* 2016; 61: 636–645.

124. Arase Y, Kobayashi M, Suzuki F, Suzuki Y, Kawamura Y, Akuta N, et al. Effect of type 2 diabetes on risk for malignancies includes hepatocellular carcinoma in chronic hepatitis C. *Hepatology* 2013; 57: 964–973.

125. Wong VW, Chan RS, Wong GL, Cheung BH, Chu WC, Yeung DK, et al. Community-based lifestyle modification programme for non-alcoholic fatty liver disease: a randomized controlled trial. *J Hepatol* 2013; 59: 536-42.

126. Glass LM, Dickson RC, Anderson JC, Suriawinata AA, Putra J, Berk BS, et al. Total Body Weight Loss of >10 % Is Associated with Improved Hepatic Fibrosis in Patients with Nonalcoholic Steatohepatitis. *Dig Dis Sci* 2015; 60: 1024–1030.

127. Castera L, Hezode, Roudot-Thoraval F, Lonjon I, Zafrani E S, Pawlotsky JM, et al. Effect of antiviral treatment on evolution of liver steatosis in patients with chronic hepatitis C: indirect evidence of a role of hepatitis C virus genotype 3 in steatosis. *Gut* 2004; 53: 420–424.

128. Belfort R, Harrison SA, Brown K, Darland C, Finch J, Hardies J, et al. A placebo-controlled trial of pioglitazone in subjects with nonalcoholic steatohepatitis. *N Engl J Med* 2006; 355: 2297-307.
129. Marchesini G, Brizi M, Bianchi G, Tomasselli S, Zoll M, Melchionda N. Metformin in non-alcoholic steatohepatitis. *Lancet* 2001; 358: 893-4.
130. Sanyal AJ, Chalasani N, Kowdley KV, McCullough A, Diehl AM, Bass NM et al. Pioglitazone, vitamin E, or placebo for nonalcoholic steatohepatitis. *N Engl J Med* 2010; 362:1675-1685.
131. Boyraz M, Pirgon Ö, Dündar B, Çekmez F, Hatipoğlu N. Long-Term Treatment with n-3 Polyunsaturated Fatty Acids as a Monotherapy in Children with Nonalcoholic Fatty Liver Disease. *J Clin Res Pediatr Endocrinol*. 2015 Jun;7(2):121-7.
132. Neuschwander-Tetri BA, Loomba R, Sanyal AJ, Lavine JE, Van Natta ML, Abdelmalek MF, et al. Farnesoid X nuclear receptor ligand obeticholic acid for non-cirrhotic, non-alcoholic steatohepatitis (FLINT): a multicentre, randomised, placebo-controlled trial. *Lancet* 2015; 385: 956-65.
133. Armstrong MJ, Gaunt P, Aithal GP, Barton D, Hull D, Parker R, et al. Liraglutide safety and efficacy in patients with non-alcoholic steatohepatitis. *Lancet* 2016; 387: 679-90.



## TABLAS

**Tabla 1. Fuerza de las recomendaciones y calidad de evidencias según el sistema GRADE<sup>1-5</sup>**

| Fuerza de recomendación y calidad de evidencia      | Claridad de balance entre efectos deseables e indeseables               | Calidad Metodológica de Apoyo a la Evidencia (ejemplos)                                                                                                                                                              | Implicaciones                                                                                                                                                                                                                                                     |
|-----------------------------------------------------|-------------------------------------------------------------------------|----------------------------------------------------------------------------------------------------------------------------------------------------------------------------------------------------------------------|-------------------------------------------------------------------------------------------------------------------------------------------------------------------------------------------------------------------------------------------------------------------|
| Recomendación fuerte, alta calidad de evidencia     | Los efectos deseables superan claramente a los indeseables, o viceversa | Evidencia consistente, procedente de ensayos clínicos aleatorizados (ECAs) bien realizados, o evidencia excepcionalmente fuerte de estudios observacionales sin sesgos.                                              | La recomendación puede aplicarse a la mayoría de los pacientes en la mayoría de las circunstancias. Es improbable que nueva investigación cambie nuestra confianza en la estimación del efecto                                                                    |
| Recomendación fuerte, moderada calidad de evidencia | Los efectos deseables superan claramente a los indeseables, o viceversa | Evidencia procedente de ECAs con limitaciones importantes (resultados inconsistentes, problemas metodológicos, indirectos o imprecisos), o evidencia excepcionalmente fuerte de estudios observacionales sin sesgos. | La recomendación puede aplicarse a la mayoría de los pacientes en la mayoría de las circunstancias. Nuevas investigaciones (si se realizan) podrían modificar de forma importante nuestra confianza en la estimación del efecto, y podrían cambiar la estimación. |
| Recomendación fuerte, baja calidad de evidencia     | Los efectos deseables superan claramente a los indeseables, o viceversa | Evidencia para, al menos, un evento crítico, procedente de estudios observacionales, ECAs con problemas serios o evidencia indirecta.                                                                                | La recomendación podría cambiar cuando se disponga de evidencia de mayor calidad. Es probable que nuevas investigaciones (si se realizan) modifiquen de forma importante nuestra confianza en la estimación del efecto, y es probable que cambien la estimación.  |

|                                                                               |                                                                         |                                                                                                                               |                                                                                                                                                                   |
|-------------------------------------------------------------------------------|-------------------------------------------------------------------------|-------------------------------------------------------------------------------------------------------------------------------|-------------------------------------------------------------------------------------------------------------------------------------------------------------------|
| Recomendación fuerte, Muy baja calidad de evidencia (aplicable muy raramente) | Los efectos deseables superan claramente a los indeseables, o viceversa | Evidencia para, al menos, un evento crítico, procedente de observaciones clínicas no sistematizadas o evidencia muy indirecta | La recomendación podría cambiar cuando se disponga de evidencia de mayor calidad; cualquier estimación del efecto sobre, al menos, un evento crítico es incierta. |
|-------------------------------------------------------------------------------|-------------------------------------------------------------------------|-------------------------------------------------------------------------------------------------------------------------------|-------------------------------------------------------------------------------------------------------------------------------------------------------------------|

|                                                    |                                                                                                                                                                                       |                                                                                                                                                                                                                      |                                                                                                                                                                                                                                                                                     |
|----------------------------------------------------|---------------------------------------------------------------------------------------------------------------------------------------------------------------------------------------|----------------------------------------------------------------------------------------------------------------------------------------------------------------------------------------------------------------------|-------------------------------------------------------------------------------------------------------------------------------------------------------------------------------------------------------------------------------------------------------------------------------------|
| Recomendación débil, alta calidad de evidencia     | Los efectos deseables son similares a los indeseables                                                                                                                                 | Evidencia consistente, procedente de ECAs bien realizados, o evidencia excepcionalmente fuerte de estudios observacionales sin sesgos.                                                                               | La mejor actitud puede variar dependiendo de las circunstancias del paciente o los valores sociales. Es improbable que nueva investigación cambie nuestra confianza en el efecto estimado.                                                                                          |
| Recomendación débil, moderada calidad de evidencia | Los efectos deseables son similares a los indeseables                                                                                                                                 | Evidencia procedente de ECAs con limitaciones importantes (resultados inconsistentes, problemas metodológicos, indirectos o imprecisos), o evidencia excepcionalmente fuerte de estudios observacionales sin sesgos. | Es probable que abordajes alternativos puedan ser mejores para determinados pacientes en algunas circunstancias. Es probable que nuevas investigaciones (si se realizan) modifiquen de forma importante nuestra confianza en la estimación del efecto, y que cambien la estimación. |
| Recomendación débil, baja calidad de evidencia     | Incertidumbre en la estimación de los efectos deseables, daños y consecuencias negativas; Los efectos deseables, daños y consecuencias negativas pueden estar equilibrados.           | Evidencia para, al menos, un evento crítico, procedente de estudios observacionales, ECAs con problemas serios o evidencia indirecta.                                                                                | Otras alternativas podrían ser igualmente razonables. Es probable que nuevas investigaciones (si se realizan) modifiquen de forma importante nuestra confianza en la estimación del efecto, y es probable que cambien la estimación.                                                |
| Recomendación débil, Muy baja calidad de evidencia | Mayor incertidumbre en la estimación de los efectos deseables, daños y consecuencias negativas; Los efectos deseables, daños y consecuencias negativas pueden o no estar equilibrados | Evidencia para al menos un evento crítico, procedente de observaciones clínicas no sistematizadas o evidencia muy indirecta                                                                                          | Otras alternativas podrían ser igualmente razonables. Cualquier estimación del efecto, al menos para un evento crítico, es muy incierta.                                                                                                                                            |

**Tabla 2. Recomendaciones para la evaluación clínica de las alteraciones metabólicas en pacientes con infección por el VIH<sup>6-9</sup>**

| 1ª VISITA                                                                                                                                                                                                                                                                                                    | ANUALMENTE                                                                                                                                                                                                                                                                                                        | BIENALMENTE |
|--------------------------------------------------------------------------------------------------------------------------------------------------------------------------------------------------------------------------------------------------------------------------------------------------------------|-------------------------------------------------------------------------------------------------------------------------------------------------------------------------------------------------------------------------------------------------------------------------------------------------------------------|-------------|
| a. Historia clínica detallada recogiendo los antecedentes personales y familiares de diabetes, dislipemia, HTA, cardiopatía isquémica, así como enfermedad cerebrovascular o arterial periférica, otras comorbilidades relevantes, los tratamientos farmacológicos concomitantes, las posibles interacciones | Valoración del estilo de vida, situación de las comorbilidades, tratamientos concomitantes y posibles interacciones medicamentosas. <b>(Recomendación fuerte, baja calidad de la evidencia)</b>                                                                                                                   |             |
| b. Si el paciente ya estaba en TAR: recoger la historia farmacológica, y el nadir de CD4. <b>(Recomendación fuerte, moderada calidad de la evidencia)</b>                                                                                                                                                    |                                                                                                                                                                                                                                                                                                                   |             |
| c. Exploración física completa con registro de la PA, índice de masa corporal, circunferencia de cintura y evaluación clínica de lipodistrofia*. <b>(Recomendación fuerte, moderada calidad de la evidencia)</b>                                                                                             | Exploración física completa, con registro de la PA, índice de masa corporal, circunferencia de cintura evaluación clínica de lipodistrofia. <b>(Recomendación fuerte, moderada calidad de la evidencia)</b>                                                                                                       |             |
| d. Hemograma y bioquímica general; triglicéridos, colesterol total, HDL y LDL; glucemia basal, sistemático de orina, y cociente urinario proteína/creatinina y albúmina/creatinina, estimación de filtrado glomerular (CKD/EPI o MDRD). <b>(Recomendación fuerte, moderada calidad de la evidencia)</b>      | Hemograma y bioquímica general: triglicéridos, colesterol total, HDL y LDL; glucemia, sistemático de orina y cociente urinario proteína/creatinina y/o cociente urinario albúmina/creatinina, estimación de filtrado glomerular (CKD/EPI o MDRD). <b>(Recomendación fuerte, moderada calidad de la evidencia)</b> |             |

|                                                                                                                                                                                                                                                                             |                                                                                                                                                                        |                                                                     |
|-----------------------------------------------------------------------------------------------------------------------------------------------------------------------------------------------------------------------------------------------------------------------------|------------------------------------------------------------------------------------------------------------------------------------------------------------------------|---------------------------------------------------------------------|
| e. ECG, sobre todo cuando se inicie TAR con fármacos que puedan afectar a la conducción cardíaca, y cuando concurren otras medicaciones que tengan el mismo efecto. <b>(Recomendación fuerte, baja calidad de evidencia)</b>                                                |                                                                                                                                                                        | ECG <b>(Recomendación fuerte, moderada calidad de la evidencia)</b> |
| f. Estimación de RCV** <b>(Recomendación fuerte, moderada calidad de la evidencia)</b>                                                                                                                                                                                      | En pacientes con factores de riesgo cardiovascular y, en general, en varones ≥40 años y mujeres ≥50 años. <b>(Recomendación fuerte, moderada calidad de evidencia)</b> |                                                                     |
| g. En casos seleccionados de pacientes con RV intermedio, puede ser recomendable medir el índice tobillo- brazo o el grosor íntima-media carotídeo para detectar aterosclerosis subclínica. <b>(Recomendación débil, baja calidad de la evidencia)</b>                      |                                                                                                                                                                        |                                                                     |
| h. En casos seleccionados de pacientes con RV intermedio, puede ser recomendable medir las concentraciones plasmáticas de PCR y/o dímero D para detectar un estado proinflamatorio y/o procoagulante mantenido. <b>(Recomendación débil, baja calidad de la evidencia).</b> |                                                                                                                                                                        |                                                                     |

\*Con el objetivo de conocer la composición corporal sería conveniente realizar una DEXA en los casos en los que se disponga del mismo. Si no es posible se realizará: Índice de masa corporal, circunferencia de cintura y evaluación morfológica de lipodistrofia.

\*\* Se remite a la sección de Riesgo Cardiovascular para decidir qué escalar usar.

HTA (Hipertensión arterial). TARV (Tratamiento antirretroviral). ECG (electrocardiograma). HDL (Lipoproteínas de alta densidad). LDL (lipoproteínas de baja densidad). Modification of Diet in Renal Disease (MDRD). Creatinine equation (CKD/EPI), PA (Presión arterial). RCV (Riesgo cardiovascular). RV (Riesgo vascular).

**Tabla 3. Factores de riesgo cardiovascular tradicionales****No modificables**

- Edad (varón  $\geq 45$  años; mujer  $\geq 55$  años o menopausia precoz sin tratamiento hormonal sustitutivo)
- Sexo masculino
- Historia familiar de cardiopatía isquémica precoz (en parientes de primer grado,  $<55$  años si es varón o  $<65$  años si es mujer)
- Antecedentes personales de cardiopatía isquémica

**Modificables**

- Tabaquismo
- Hipertensión arterial ( $\geq 140/90$  mmHg o en tratamiento)
- Diabetes mellitus (DM) (a) o intolerancia a la glucosa
- Colesterol LDL elevado (límite alto, 130-159 mg/dL; alto, 160-189 mg/dL; muy alto,  $>190$  mg/dL)
- Colesterol HDL bajo ( $<40$  mg/dL en hombres y  $<50$  mg/dl en mujeres) (b)
- Obesidad
- Inactividad física
- Dieta aterogénica

(a) La DM se considera un factor de riesgo equivalente a la cardiopatía isquémica. (b) Un colesterol HDL elevado ( $>60$  mg/dL) es un factor protector.

**Tabla 4. Parámetros para evaluar el riesgo cardiovascular del paciente con VIH**

|                                |                                                                                                     |
|--------------------------------|-----------------------------------------------------------------------------------------------------|
|                                |                                                                                                     |
| Historia Clínica del Paciente  | Edad, Sexo. Antecedentes familiares de ECV.                                                         |
| Valoración Sanitaria           | Tensión Arterial                                                                                    |
| Valoración Antropométrica      | Peso, Talla e Índice de Masa Corporal (IMC).<br>Circunferencia de Cintura. Composición corporal.    |
| Valoración Dietética           | Recordatorio de 24h*. Frecuencia del Consumo de                                                     |
| Valoración de Actividad Física | Tipo de ejercicio, tiempo e intensidad.                                                             |
| Valoración Bioquímica          | Glucosa en ayunas y Hemoglobina Glicosilada (si glucosa basal alterada). Perfil Lipídico en sangre: |

\*Recordatorio 24 horas: Registro de todos los alimentos consumidos el día inmediato anterior.

**Tabla 5. Beneficios psicológicos del ejercicio físico**

| <b>Aumenta</b>           | <b>Disminuye</b>      |
|--------------------------|-----------------------|
| Rendimiento académico    | Absentismo laboral    |
| Asertividad              | Consumo de alcohol    |
| Confianza                | Ansiedad Depresión    |
| Estabilidad emocional    | Fobias                |
| Percepción               | Conductas Psicóticas  |
| Memoria                  | Tensión               |
| Imagen corporal positiva | Hostilidad            |
| Autocontrol Bienestar    | Errores en el trabajo |
| Eficacia laboral         | Cefaleas              |



Tabla 6. Manejo del síndrome lipodistrófico

|                    |       |                                                                                                                                                                                                                                                                                                               |                                                                                                                                                                                                                                                                                                                                |
|--------------------|-------|---------------------------------------------------------------------------------------------------------------------------------------------------------------------------------------------------------------------------------------------------------------------------------------------------------------|--------------------------------------------------------------------------------------------------------------------------------------------------------------------------------------------------------------------------------------------------------------------------------------------------------------------------------|
| Síndrome           |       | Lipoatrofia                                                                                                                                                                                                                                                                                                   | Lipoacúmulo                                                                                                                                                                                                                                                                                                                    |
| Diagnóstico        |       | DEXA                                                                                                                                                                                                                                                                                                          |                                                                                                                                                                                                                                                                                                                                |
| Tratamiento        |       |                                                                                                                                                                                                                                                                                                               |                                                                                                                                                                                                                                                                                                                                |
| Principal          | línea | Prevención                                                                                                                                                                                                                                                                                                    |                                                                                                                                                                                                                                                                                                                                |
| Fármacos           |       | Evitar ITIAN timidínicos                                                                                                                                                                                                                                                                                      | No hay evidencias claras                                                                                                                                                                                                                                                                                                       |
| Vida saludable     |       | Dieta saludable                                                                                                                                                                                                                                                                                               |                                                                                                                                                                                                                                                                                                                                |
| Cirugía reparadora |       | <p>La infiltración de sustancias sintéticas (ácido poliláctico, poliacrilamidas, microesferas de hisdroxiapatita) o de grasa autóloga.</p> <p>El uso de prótesis de silicona para la reparación de lipoatrofia en las nalgas no se recomienda por la frecuente aparición de trastornos tróficos cutáneos.</p> | <p>La liposucción ultrasónica (UAL) se utiliza para el acumulo de grasa cervical, dorsal, abdominal, y los lipomas localizados. Mejora los resultados de la liposucción convencional, pero tiene una recidiva del 15%.</p> <p>La resección quirúrgica se usa en los depósitos de grasa localizada y en reducciones de mama</p> |

**Tabla 7. Factores generales y específicos relacionados con la aparición de DM**

| POBLACIÓN GENERAL                                                                                                                                                                                                                                                                                                                                                                                                                                                                                                                                                                                                                                                                                                                                                                                                                         | ESPECÍFICOS POBLACIÓN VIH                                                                                                                                                                                                                                                                                                                                                                                                                                                                                                                                                                                                                                                                                                                                                                                                                                        |
|-------------------------------------------------------------------------------------------------------------------------------------------------------------------------------------------------------------------------------------------------------------------------------------------------------------------------------------------------------------------------------------------------------------------------------------------------------------------------------------------------------------------------------------------------------------------------------------------------------------------------------------------------------------------------------------------------------------------------------------------------------------------------------------------------------------------------------------------|------------------------------------------------------------------------------------------------------------------------------------------------------------------------------------------------------------------------------------------------------------------------------------------------------------------------------------------------------------------------------------------------------------------------------------------------------------------------------------------------------------------------------------------------------------------------------------------------------------------------------------------------------------------------------------------------------------------------------------------------------------------------------------------------------------------------------------------------------------------|
| <ul style="list-style-type: none"> <li>- Edad <math>\geq</math> 45 años</li> <li>- Índice de masa corporal <math>\geq</math> 25 kg/m<sup>2</sup></li> <li>- Hª familiar en primer grado de DM</li> <li>- Falta de actividad física</li> <li>- Grupo étnico con elevado riesgo de DM (afro-americanos, hispanos)</li> <li>- Historia de macrosomía fetal (<math>&gt;</math> 4,1 Kg)</li> <li>- Diabetes mellitus gestacional</li> <li>- Hipertensión arterial (TA <math>\geq</math> 140/90 mmHg)</li> <li>- Dislipemia:                         <ul style="list-style-type: none"> <li>o Colesterol-HDL <math>\leq</math> 35mg/dL o</li> <li>o Triglicéridos <math>\geq</math> 250 mg/dL</li> </ul> </li> <li>- Diagnóstico previo de GBA* o de ITG*</li> <li>- Altas dosis de estatinas en población predispuesta (GBA*, ITG*)</li> </ul> | <p><b><u>Por la infección VIH:</u></b></p> <ul style="list-style-type: none"> <li>- Inflamación (TNF<math>\alpha</math>), nadir CD4</li> </ul> <p><b><u>Por las comorbilidades:</u></b></p> <ul style="list-style-type: none"> <li>- Coinfección por virus hepatitis C</li> <li>- Esteatosis hepática</li> <li>- Hipogonadismo</li> </ul> <p><b><u>Por el tratamiento:</u></b></p> <ul style="list-style-type: none"> <li>- Directos:                         <ul style="list-style-type: none"> <li>Inhibidores proteasa (inhibición GLU-4, dislipemia),</li> <li>Inhibidores de la transcriptasa inversa análogos timidínicos (AZT,d4T): daño mitocondrial.</li> </ul> </li> <li>- Indirectos:                         <ul style="list-style-type: none"> <li>Opiáceos</li> <li>Lipodistrofia</li> </ul> </li> <li>- Uso de pentamidina parenteral.</li> </ul> |

**Tabla 8. Criterios diagnósticos de las alteraciones del metabolismo hidrocarbonado<sup>9</sup>**

|                              | GLUCEMIA<br>BASAL (mg/dL) | GLUCEMIA A<br>LAS 2H TTOG 75<br>g (mg/dL) | A1c% (DCCT) |
|------------------------------|---------------------------|-------------------------------------------|-------------|
| DIABETES                     | ≥126 → o                  | ≥ 200 → o                                 | ≥ 6,5%      |
| GLUCOSA<br>BASAL<br>ALTERADA | 100-125 → y               | <140                                      | 5.7-6.4%    |
| INTOLERANCIA<br>A LA GLUCOSA | <126 → y                  | 140-199                                   |             |

**Tabla 9. Algoritmo terapéutico de la diabetes (modificación EACS 2015)<sup>9</sup>**

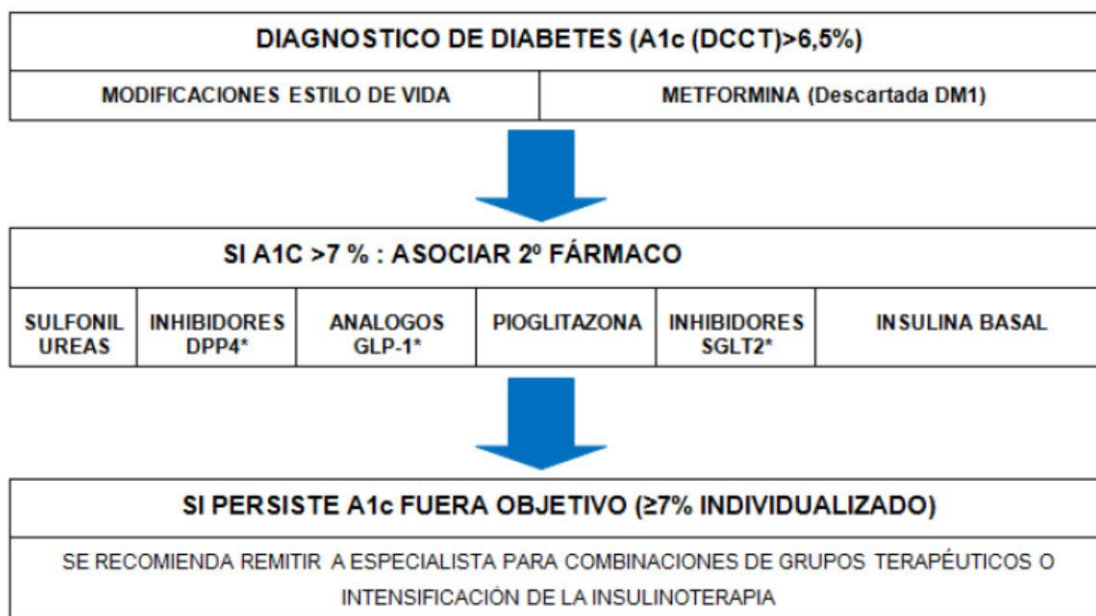

Inhibidores IDPP4: inhibidores dipeptidil-peptidasa 4; aGLP-1: análogos receptor de péptido similar a glucagón 1;  
inhibidores SGLT2: inhibidores cotransportador sodio-glucosa tipo 2.

\*: no evidencia probada en población VIH.

**Tabla 10. Características de los fármacos para el tratamiento de la diabetes en VIH**

| Intervención                 | Dosis                            | Reducción A1c | Efectos secundarios                                   | Interacciones#                                           | Comentarios                                     |
|------------------------------|----------------------------------|---------------|-------------------------------------------------------|----------------------------------------------------------|-------------------------------------------------|
| <b>Estilo de vida</b>        | Dieta y ejercicio                | 1-2%          | No                                                    | No                                                       | Adherencia escasa                               |
| <b>Metformina</b>            | Inicio 850 mg/d, máximo 2550mg/d | 1-2%          | Diarrea, meteorismo                                   | Ajuste de dosis con DTG, RPV y cobicistat.               | Bajo coste. No en acidosis láctica ni en ERC*** |
| <b>Sulfonilureas</b>         | 1-3 comp/d                       | 1%*           | Hipoglucemia, Aumento de peso                         | Ajuste de dosis con cobicistat, IP, NNRTIs               | bajo coste, potentes, alguna más RCV*           |
| <b>Inhibidores de DPP-4.</b> | 1-2 comp/d                       | 0.75% *       | Escasos. Rinofaringitis, angioedema                   | Ajuste de dosis con cobicistat, IP, NNRTIs.              | Poca experiencia en VIH.                        |
| <b>Análogos GLP-1</b>        | 1 iny/12-24h/ sem                | 0.75-1%*      | Náuseas, vómitos, pancreatitis                        | No                                                       | Injectables, en obesidad (IMC>30).              |
| <b>Pioglitazona</b>          | 15-45 mg/d                       | 0.5-1.4%      | Edemas, insuficiencia cardíaca, fracturas             | Ajuste de dosis con cobicistat, IP, NNRTIs               | Cáncer de vejiga. Sólo si lipoatrofia.          |
| <b>Inhibidores SGLT2</b>     | 1 comp/d.                        | 0.75-1%*      | Infecciones genitourinarias, Cetoacidosis euglucémica | Potencial ajuste de dosis de canagliflozin con EFV, RTV. | No experiencia. Reducción mortalidad en no VIH. |
| <b>Insulina</b>              | Ver pie de tabla**               | Sin límite    | Hipoglucemia, ganancia de peso                        | No                                                       | Nuevas insulinas en desarrollo.                 |

**Tabla 11. Clasificación de las estatinas en función de su intensidad en la reducción  
LDLc**

| <b>Estatinas de Alta Intensidad</b>           | <b>Estatinas de Moderada</b>                                                                                                              | <b>Estatinas de Baja Intensidad</b>                                  |
|-----------------------------------------------|-------------------------------------------------------------------------------------------------------------------------------------------|----------------------------------------------------------------------|
| Reducción de LDLc $\geq$ 50 %                 | Reducción de LDLc entre 30 y                                                                                                              | Reducción de LDLc < 30 %                                             |
| Atorvastatina 40-80 mg<br>Rosuvastatina 20 mg | Atorvastatina 10-20 mg<br>Rosuvastatina 10 mg<br>Pitavastatina 2-4 mg<br>Pravastatina 40 mg<br>Fluvastatina 40 mg (liberación prolongada) | Pravastatina 10-20 mg<br>Pitavastatina 1 mg<br>Fluvastatina 20-40 mg |

**Tabla 12. Indicaciones del tratamiento con estatinas ACC/AHA Guidelines 2014<sup>9</sup>**

| Situación                                        | Evaluación del RCV a 10 años | Tratamiento con estatinas              |
|--------------------------------------------------|------------------------------|----------------------------------------|
| ECV establecida<br>LDLc $\geq$ 190 mg/dl         | No necesario                 | Alta Intensidad<br>Alta Intensidad     |
| DM tipo 1 y 2 40-75 años                         | $\geq$ 7,5<br>$\leq$ 7,5     | Alta Intensidad<br>Moderada Intensidad |
| Prevención Primaria y LDLc <190 mg/dl 40-75 años | $\geq$ 7,5                   | Moderada Intensidad                    |

\* En caso de tratamiento con ARV se recomienda iniciar con estatinas de moderada intensidad.

**Tabla 13. Objetivos de LDLc según nivel de riesgo JOINT ESC Guidelines 2016<sup>7</sup>**

| Nivel de riesgo                                                                            | Objetivo LDL                              |
|--------------------------------------------------------------------------------------------|-------------------------------------------|
| Muy alto riesgo:<br>-ECV establecida<br>-DM2<br>-DM1 con lesión órgano diana<br>-SCORE>10% | LDL<70 mg/dl<br>ó<br>Reducción LDL<br>50% |
| Alto riesgo<br>-SCORE 5-10%<br>-Algún factor de riesgo muy elevado                         | LDL <100 mg/dl                            |
| Riesgo moderado<br>-SCORE 1-5%                                                             | LDL <115 mg/dl                            |



**Tabla 14. Principales interacciones de los fármacos antirretrovirales con las estatinas**

|      | ATORVA | ROSU | PRAVA | SIMVA | PITA |
|------|--------|------|-------|-------|------|
| ATV  | ↑      | ↑    | ↑     | X     | ↑    |
| DRV  | ↑      | ↑    | ↑     | X     | =    |
| COBI | ↑      | ↑    | ↑     | X     | ↑    |
| RTV  | ↑      | ↑    | =     | X     | =    |
| EFV  | ↓      | =    | ↓     | ↓     | =    |
| NVP  | ↓      | =    | =     | ↓     | =    |
| ETR  | =      | =    | =     | ↓     | =    |
| RPV  | =      | =    | =     | =     | =    |
| RAL  | =      | =    | =     | =     | =    |
| DTG  | =      | =    | =     | =     | =    |
| MVC  | =      | =    | =     | =     | =    |

X : No deberían coadministrarse; ↑ : Precaución por incremento de niveles estatina y riesgo potencial de toxicidad ; ↓ : Reducción esperada de la eficacia hipolipemiente por descenso de los niveles plasmáticos de la estatina ; = : No interacción esperada. ATV: Atazanavir; DRV: darunavir; Cobi: cobicistat; RTV: ritonavir; EFV: efavirenz; NVP: nevirapina; ETR: etravirina; RPV: rilpivirina; RAL: raltegravir; DTG: dolutegravir; MVC: maraviroc.

**Tabla 15. Clasificación de HTA según el RCV total**

| <b>FACTORES DE RIESGO</b>               | <b>LIMITE ALTO<br/>PAS 130-139<br/>PAD 85-89</b> | <b>HTA GRADO 1<br/>PAS 140-159<br/>PAD 90-99</b> | <b>HTA GRADO 2<br/>PAS 160-169<br/>PAD 100-109</b> | <b>HTA GRADO 3<br/>PAS≥180<br/>PAD≥110</b> |
|-----------------------------------------|--------------------------------------------------|--------------------------------------------------|----------------------------------------------------|--------------------------------------------|
| SIN FACT RIESGO                         |                                                  | RIESGO BAJO                                      | <i>RIESGO</i><br>MODERADO                          | <i>RIESGO</i> ALTO                         |
| 1-2 FACT RIESGO                         | RIESGO BAJO                                      | RIESGO MODERADO                                  | <i>RIESGO</i><br>MODERADO A ALTO                   | <i>RIESGO</i> ALTO                         |
| ≥3 FACT RIESGO                          | <i>RIESGO BAJO A MODERADO</i>                    | RIESGO MODERADO                                  | <i>RIESGO</i><br>MODERADO A ALTO                   | <i>RIESGO</i> ALTO                         |
| LOS, IRC ESTADIO 3 O DM                 | <i>RIESGO MODERADO A ALTO</i>                    | RIESGO ALTO                                      | <i>RIESGO</i> ALTO                                 | <i>RIESGO</i> ALTO A MUY ALTO              |
| ENF CARDIOVASC O NEFROPATIA ESTABLECIDA | <i>RIESGO</i> MUY ALTO                           | RIESGO MUY ALTO                                  | <i>RIESGO</i> MUY ALTO                             | <i>RIESGO</i> MUY ALTO                     |

Riesgo bajo, moderado, alto y muy alto alude al riesgo a 10 años de presentar un evento CV mortal o no mortal. LOS: lesión orgánica subclínica.

**Tabla 16. Determinaciones a realizar en pacientes VIH con HTA**

|                                                                                                                                                                                                                                                                                                                                                                                                                                        |
|----------------------------------------------------------------------------------------------------------------------------------------------------------------------------------------------------------------------------------------------------------------------------------------------------------------------------------------------------------------------------------------------------------------------------------------|
| <b>PRUEBAS SISTEMÁTICAS:</b>                                                                                                                                                                                                                                                                                                                                                                                                           |
| <ul style="list-style-type: none"> <li>• Analítica de sangre con glucemia, colesterol total, LDL y HDL, triglicéridos, sodio y potasio, ácido úrico, creatinina con estimación del filtrado glomerular</li> <li>• Análisis básico de orina con examen microscópico, proteínas, albúmina, creatinina, microalbuminuria, cocientes albumina/creatinina y proteína/creatinina</li> <li>• Electrocardiograma de 12 derivaciones</li> </ul> |
| <b>PRUEBAS ADICIONALES EN PACIENTES SELECCIONADOS</b>                                                                                                                                                                                                                                                                                                                                                                                  |
| <ul style="list-style-type: none"> <li>• HbA1c si glucemia basal &gt; de 102 mm/dl o diagnóstico previo de DM</li> <li>• Proteinuria cuantitativa</li> <li>• MAPA o AMPA</li> <li>• Ecocardiograma</li> <li>• Holter en caso de arritmias</li> <li>• Dopler carotídeo</li> <li>• Velocidad de onda de pulso</li> <li>• Índice tobillo-brazo</li> <li>• Fondo de ojo</li> </ul>                                                         |
| <b>EVALUACIÓN AMPLIADA (competencia del especialista)</b>                                                                                                                                                                                                                                                                                                                                                                              |
| <ul style="list-style-type: none"> <li>• Búsqueda en profundidad de lesión cerebral, cardíaca, renal o vascular. Obligatorio en caso de HTA resistente o complicada</li> <li>• Búsqueda de HTA secundaria cuando lo sugiera la anamnesis, exploración o pruebas sistemáticas: determinación de renina, aldosterona, corticoides y catecolaminas en plasma y orina, arteriografía, ecografía renal y suprarrenal, TAC o RNM</li> </ul>  |

**Tabla 17. Indicaciones de tratamiento para la HTA**

| <b>FACTORES DE RIESGO</b>                                               | <b>NORMAL ALTA<br/>PAS 130-139<br/>PAD 85-89</b> | <b>HTA GRADO 1<br/>PAS 140-159<br/>PAD 90-99</b>                               | <b>HTA GRADO 2<br/>PAS 160-169<br/>PAD 100-109</b>                         | <b>HTA GRADO 3<br/>PAS <math>\geq 180</math><br/>PAD <math>\geq 110</math></b> |
|-------------------------------------------------------------------------|--------------------------------------------------|--------------------------------------------------------------------------------|----------------------------------------------------------------------------|--------------------------------------------------------------------------------|
| SIN FACTORES DE RIESGO                                                  | NO INTERVENCIÓN                                  | MODIFICACION ESTILO DE VIDA VARIOS MESES SEGUIDO DE FARMACOS SI NO HAY CONTROL | MODIFICACION ESTILO VIDA UNAS SEMANAS SEGUIDO FARMACOS SI NO HAY CONTROL   | MODIFICACION ESTILO VIDA + INICIO FARMACOS INMEDIATA                           |
| 1-2 FACTORES DE RIESGO                                                  | MODIFICACION ESTILO DE VIDA                      | MODIFICACION ESTILO VIDA VARIAS SEMANAS SEGUIDO FARMACOS SI NO HAY CONTROL     | MODIFICACION ESTILO VIDA VARIAS SEMANAS SEGUIDO FARMACOS SI NO HAY CONTROL | MODIFICACION ESTILO DE VIDA E INICIO FARMACOS INMEDIATA                        |
| $\geq 3$ FACTORES DE RIESGO                                             | MODIFICACION ESTILO DE VIDA.                     | MODIFICACION ESTILO DE VIDA SEGUIDO FARMACOS SI NO HAY CONTROL                 | MODIFICACION ESTILO DE VIDA + FARMACOS                                     | MODIFICACION ESTILO DE VIDA E INICIO FARMACOS INMEDIATA                        |
| DAÑO ORGÁNICO, IRC ESTADÍO 3 O DIABETES                                 | MODIFICACION ESTILO DE VIDA                      | MODIFICACION ESTILO DE VIDA SEGUIDO FARMACOS SI NO HAY CONTROL                 | MODIFICACION ESTILO DE VIDA + FARMACOS                                     | MODIFICACION ESTILO DE VIDA E INICIO FARMACOS INMEDIATA                        |
| ECV SINTOMÁTICA, ERC ESTADÍO $\geq 4$ O DIABETES CON DAÑO ORGÁNICO/FRCV | MODIFICACION ESTILO DE VIDA                      | MODIFICACION ESTILO DE VIDA E INICIO FARMACOS                                  | MODIFICACION ESTILO DE VIDA + FARMACOS                                     | MODIFICACION ESTILO DE VIDA E INICIO FARMACOS INMEDIATA                        |

**TABLA 18 . Situaciones que favorecen el uso de determinados fármacos antihipertensivos en vez de otros**

| Diuréticos tiazídicos                                                                                                                                                                                                                                         | Bloqueadores beta                                                                                                                                                                                          | Antagonistas del calcio<br>(dihidropiridínicos)                                                                                                                          | Antagonistas del calcio<br>(verapamilo/diltiazem)                           |
|---------------------------------------------------------------------------------------------------------------------------------------------------------------------------------------------------------------------------------------------------------------|------------------------------------------------------------------------------------------------------------------------------------------------------------------------------------------------------------|--------------------------------------------------------------------------------------------------------------------------------------------------------------------------|-----------------------------------------------------------------------------|
| Hipertensión sistólica aislada<br>(ancianos)<br>Insuficiencia cardíaca<br>Hipertensión en raza negra                                                                                                                                                          | Angina de pecho<br>Tras infarto de miocardio<br>Insuficiencia cardíaca<br>Taquiarritmias<br>Glaucoma<br>Embarazo                                                                                           | Hipertensión sistólica aislada<br>(ancianos)<br>Angina de pecho<br>Hipertrofia del VI<br>Aterosclerosis<br>carotídea/coronaria<br>Embarazo<br>Hipertensión en raza negra | Angina de pecho<br>Aterosclerosis carotídea<br>Taquicardia supraventricular |
| IECA                                                                                                                                                                                                                                                          | Antagonistas de los receptores<br>de angiotensina                                                                                                                                                          | Diuréticos (antialdosterónicos)                                                                                                                                          | Diuréticos de asa                                                           |
| Insuficiencia cardíaca<br>Disfunción del VI<br>Tras infarto de miocardio<br>Nefropatía diabética<br>Nefropatía no diabética<br>Hipertrofia del VI<br>Aterosclerosis carotídea<br>Proteinuria/microalbuminuria<br>Fibrilación auricular<br>Síndrome metabólico | Insuficiencia cardíaca<br>Tras infarto de miocardio<br>Nefropatía diabética<br>Proteinuria/microalbuminuria<br>Hipertrofia del VI<br>Fibrilación auricular<br>Síndrome metabólico<br>Tos inducida por IECA | Insuficiencia cardíaca<br>Tras infarto de miocardio                                                                                                                      | Enfermedad renal en fase terminal<br>Insuficiencia cardíaca                 |

IECA: inhibidores de la enzima de conversión de la angiotensina; VI: ventrículo izquierdo.

**Tabla 19. Recomendaciones de ajuste de dosis entre antirretrovirales e inhibidores de la fosfodiesterasa-5**

|            | SILDENAFILO                                                                                                  | TADALAFILO       | VARDENAFILO     |
|------------|--------------------------------------------------------------------------------------------------------------|------------------|-----------------|
| ATV/r-cobi | Dosis máxima                                                                                                 | Dosis máxima     | Dosis máxima    |
| DRV/r-cobi | recomendada:                                                                                                 | recomendada:     | recomendada:    |
| LPV/r      | 25 mg/48 horas                                                                                               | 5-10 mg/72 horas | 2.5 mg/72 horas |
| EVG-cobi   | Monitorizar efectos adversos                                                                                 |                  |                 |
| EFV        | Las concentraciones plasmáticas pueden disminuir, reduciendo su eficacia terapéutica<br>Monitorizar eficacia |                  |                 |
| ETV        |                                                                                                              |                  |                 |
| NVP        |                                                                                                              |                  |                 |
| ITIAN      | No precisan ajuste de dosis                                                                                  |                  |                 |
| RPV        |                                                                                                              |                  |                 |
| MVC        |                                                                                                              |                  |                 |
| DTG, RAL   |                                                                                                              |                  |                 |
|            |                                                                                                              |                  |                 |

Se recomienda consultar la ficha técnica de cada fármaco y las páginas web dedicadas a las interacciones ([www.interaccionesvih.com](http://www.interaccionesvih.com) y [www.hivdruginteractions.org](http://www.hivdruginteractions.org)).

**Figura 1. Esquema de la distribución de la grasa en una sección abdominal en la obesidad de la población general y la obesidad visceral asociada al VIH**

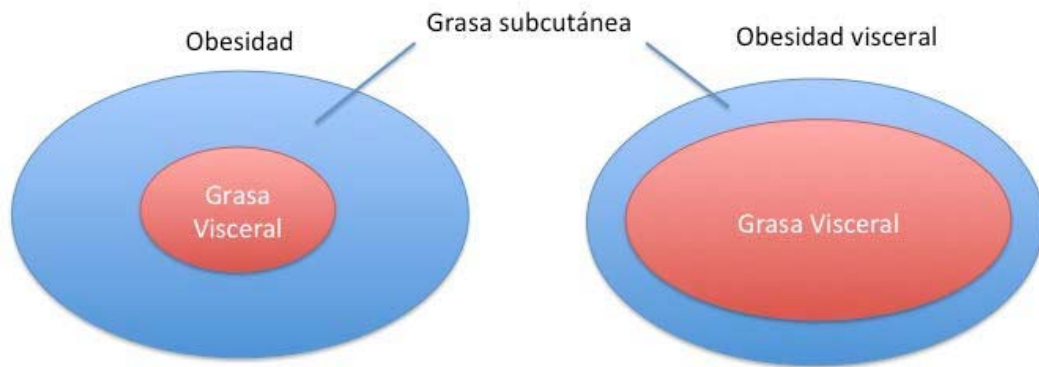

**Figura 2.- Algoritmo del tratamiento de la dislipemia en pacientes VIH en TAR.**  
 Adaptado según Joint ESC Guidelines 2016, ACC/AHA Guidelines 2014 y  
 European AIDS Guidelines 2015<sup>7,8,9</sup>

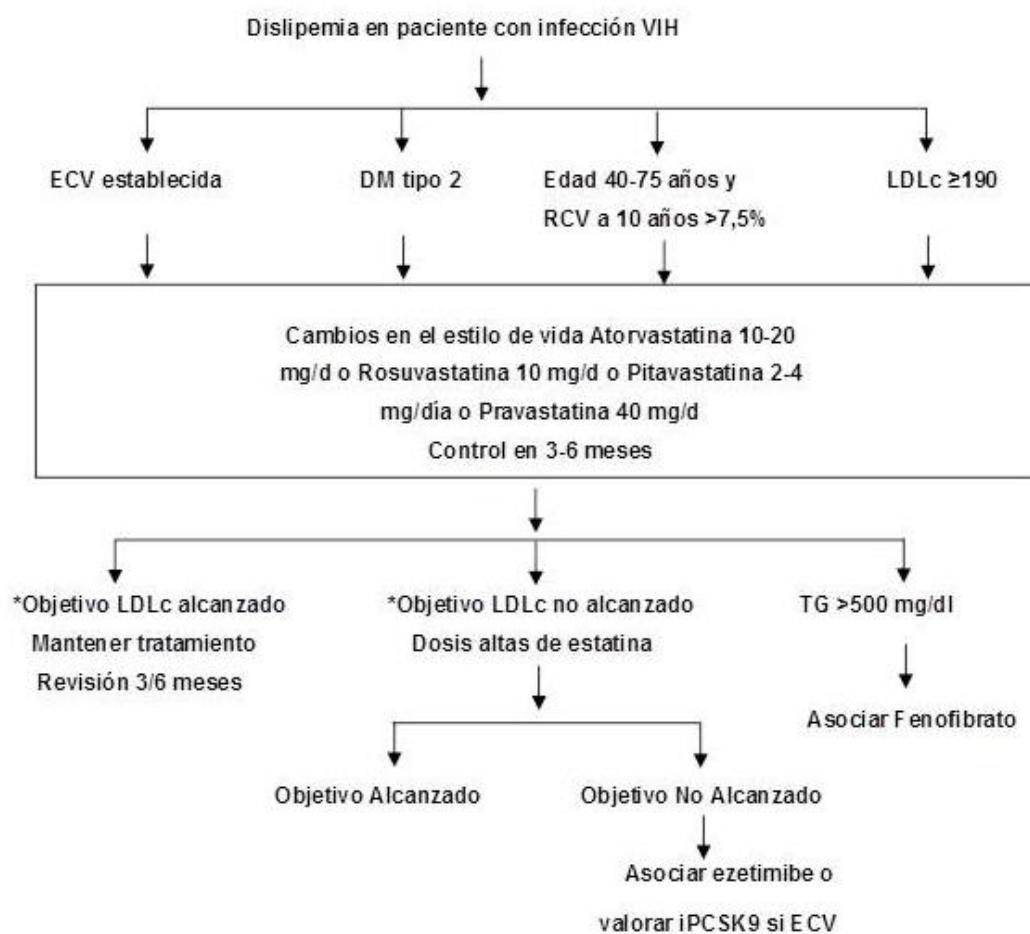

\* Objetivo LDLc: Según situación clínica y Guías:  
 - Reducción >50% sobre niveles iniciales  
 - LDLc ≤80 o ≤115 mg/dl  
 - LDL <100



**Figura 3 . Algoritmo de tratamiento para la HTA**

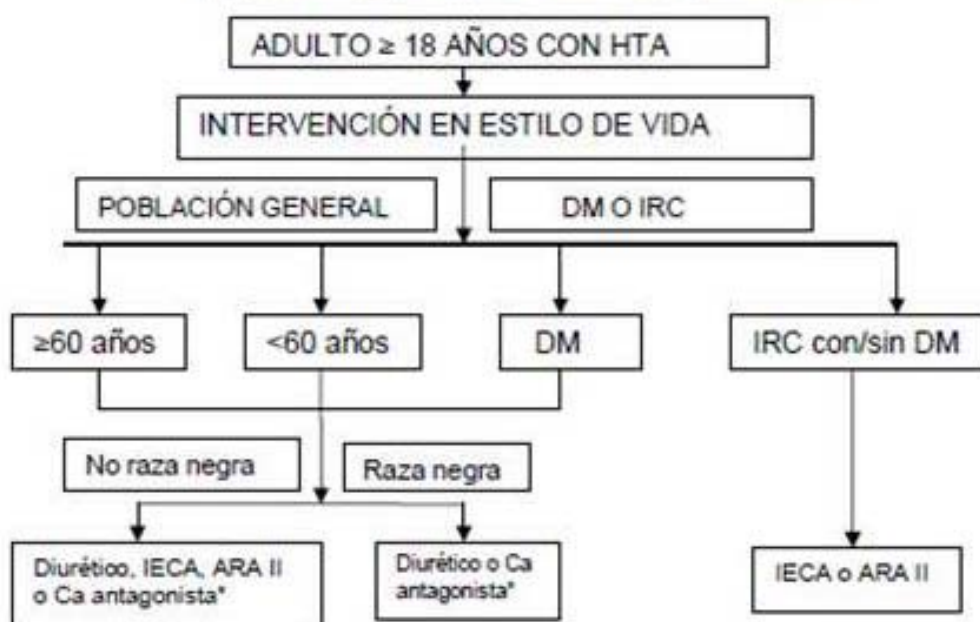

**Figura 4 . Tratamiento del paciente con infección por el VIH con DE**

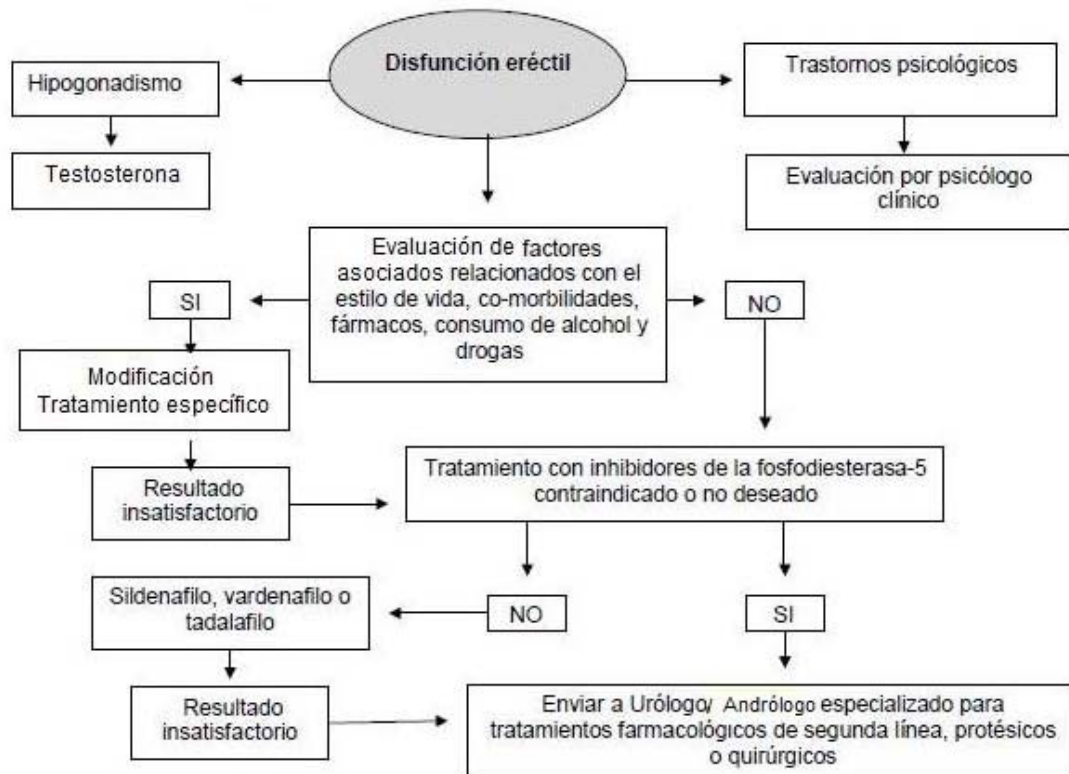

Supplement: mmc1 [file S2529993X18302727:mmc1.pdf]
